# Supplementary material
Source: publisher figshare collection journal article supplement (https://acs.figshare.com/ndownloader/files/5058316)

**Supporting Information for:**

**Air-Initiated Radical Polymerization of Lithium Salts of**  
 **$\omega$ -(Undecamethylcarba-*closo*-dodecaboran-1'-yl)alk-1-enes,  $\text{CH}_2=\text{CH}(\text{CH}_2)_{n-2}\text{C}(\text{BMe})_{11}^- \text{Li}^+$**

Kamesh Vyakaranam, Stefanie Körbe and Josef Michl\*

Department of Chemistry and Biochemistry, University of Colorado, Boulder, 80309-0215

\*To whom correspondence should be addressed; email: [michl@eefus.colorado.edu](mailto:michl@eefus.colorado.edu)

## Supporting Information Table of Contents

|                                                                                           |     |
|-------------------------------------------------------------------------------------------|-----|
| <sup>1</sup> H NMR spectrum in acetone: poly- <b>5</b> [2] prepared with air initiation   | S1  |
| <sup>1</sup> H NMR spectrum in acetone: poly- <b>6</b> [2] prepared with air initiation   | S2  |
| <sup>1</sup> H NMR spectrum in acetone: poly- <b>7</b> [2] prepared with air initiation   | S3  |
| <sup>1</sup> H NMR spectrum in acetone: poly- <b>5</b> [2] prepared with AIBN initiation  | S4  |
| <sup>1</sup> H NMR spectrum in acetone: poly- <b>6</b> [2] prepared with AIBN initiation  | S5  |
| <sup>1</sup> H NMR spectrum in acetone: poly- <b>7</b> [2] prepared with AIBN initiation  | S6  |
| <sup>1</sup> H NMR spectrum in acetone: poly- <b>5</b> [2] prepared with DTBP initiation  | S7  |
| <sup>1</sup> H NMR spectrum in acetone: poly- <b>6</b> [2] prepared with DTBP initiation  | S8  |
| <sup>1</sup> H NMR spectrum in acetone: poly- <b>7</b> [2] prepared with DTBP initiation  | S9  |
| <sup>13</sup> C NMR spectrum in acetone: poly- <b>5</b> [2] prepared with air initiation  | S10 |
| <sup>13</sup> C NMR spectrum in acetone: poly- <b>6</b> [2] prepared with air initiation  | S11 |
| <sup>13</sup> C NMR spectrum in acetone: poly- <b>7</b> [2] prepared with air initiation  | S12 |
| <sup>13</sup> C NMR spectrum in acetone: poly- <b>5</b> [2] prepared with DTBP initiation | S13 |
| <sup>13</sup> C NMR spectrum in acetone: poly- <b>6</b> [2] prepared with DTBP initiation | S14 |
| <sup>13</sup> C NMR spectrum in acetone: poly- <b>7</b> [2] prepared with DTBP initiation | S15 |
| <sup>13</sup> C NMR spectrum in acetone: poly- <b>5</b> [2] prepared with AIBN initiation | S16 |
| <sup>13</sup> C NMR spectrum in acetone: poly- <b>6</b> [2] prepared with AIBN initiation | S17 |
| <sup>13</sup> C NMR spectrum in acetone: poly- <b>6</b> [2] prepared with AIBN initiation | S18 |

# $^1\text{H}$ NMR spectrum in acetone: poly-5[2] prepared with air initiation

after trichloroacetyl isocyanate treatment

original polymer

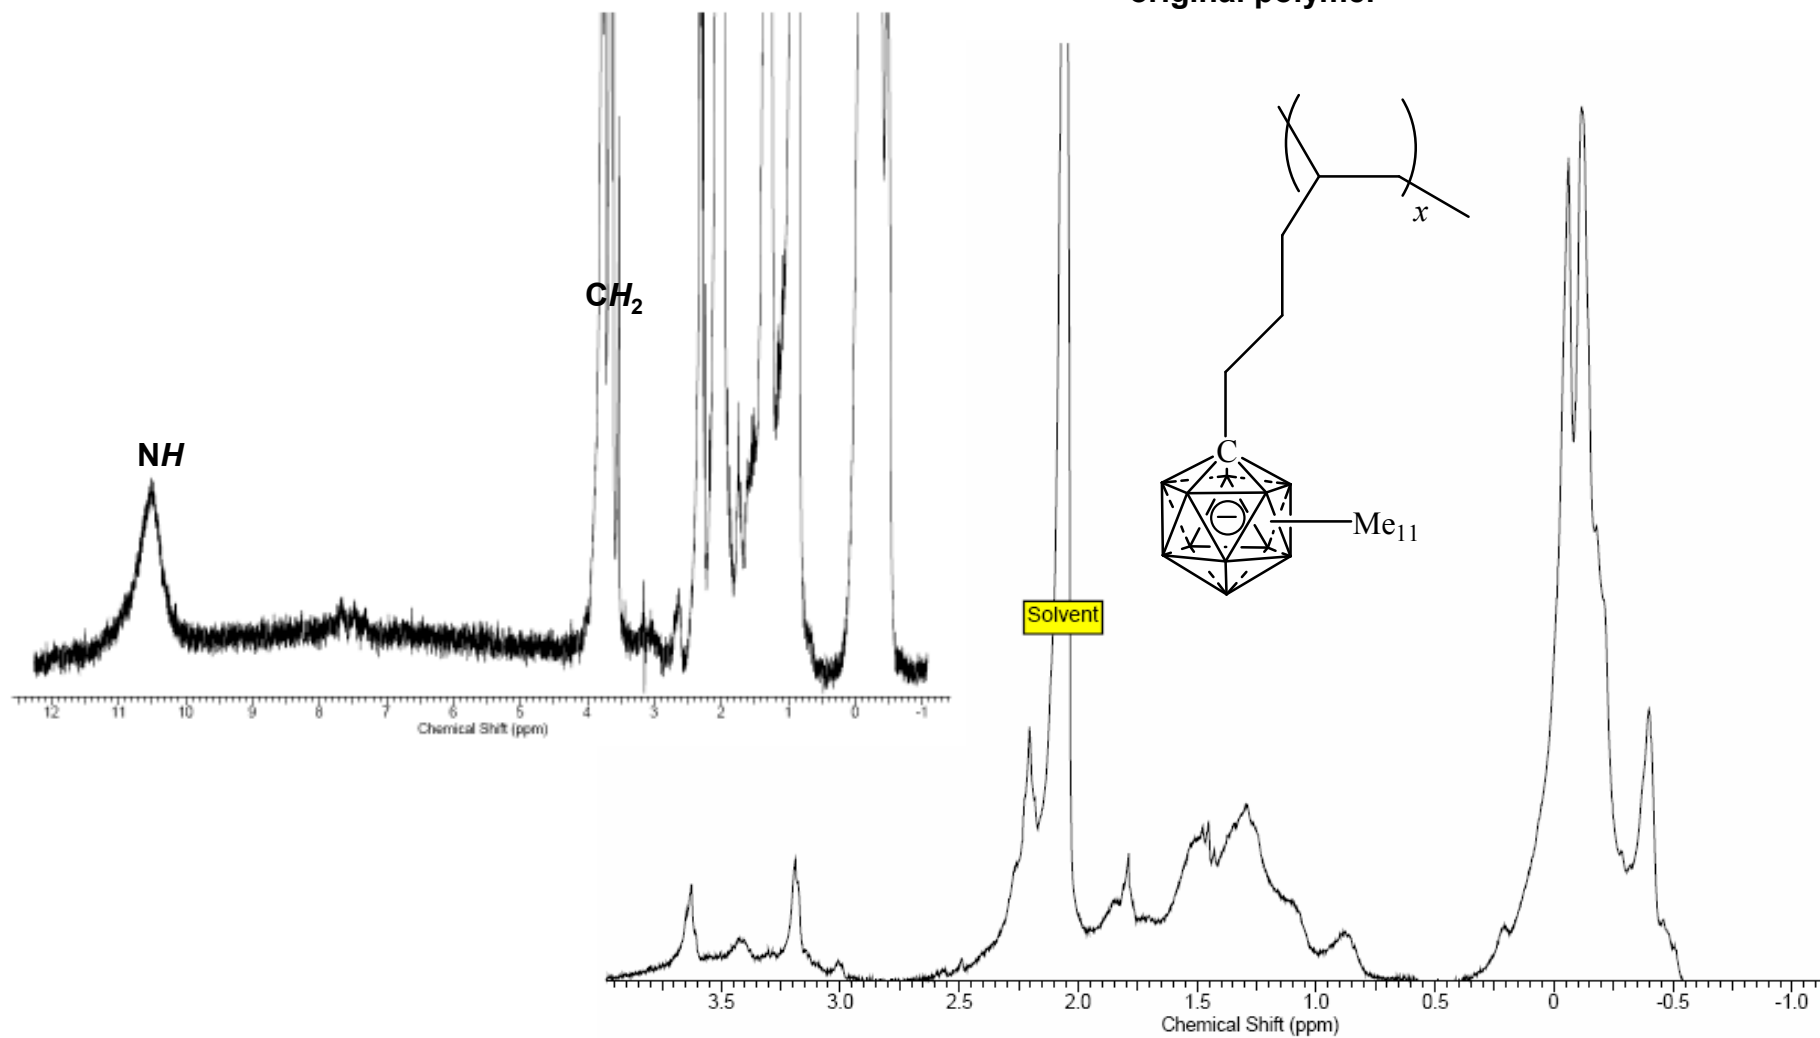

# $^1\text{H}$ NMR spectrum in acetone: poly-6[2] prepared with air initiation

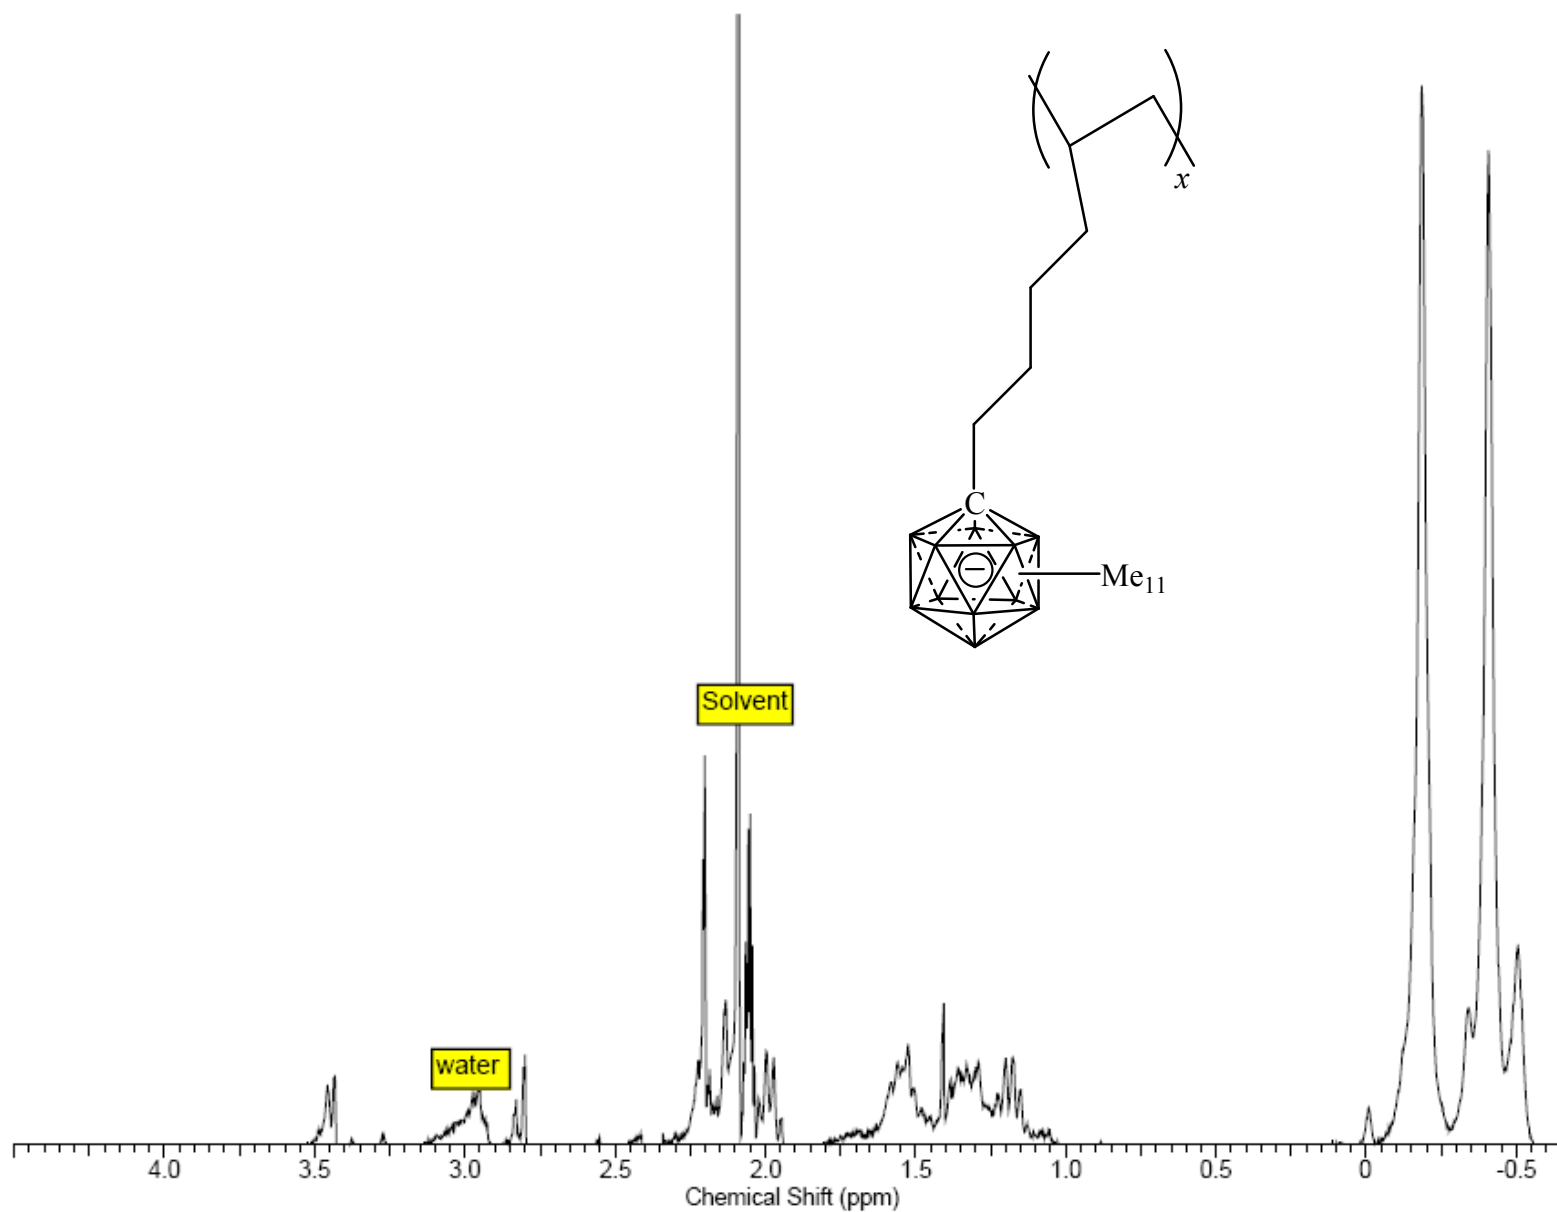

**$^1\text{H}$  NMR spectrum in acetone: poly-7[2] prepared with air initiation**

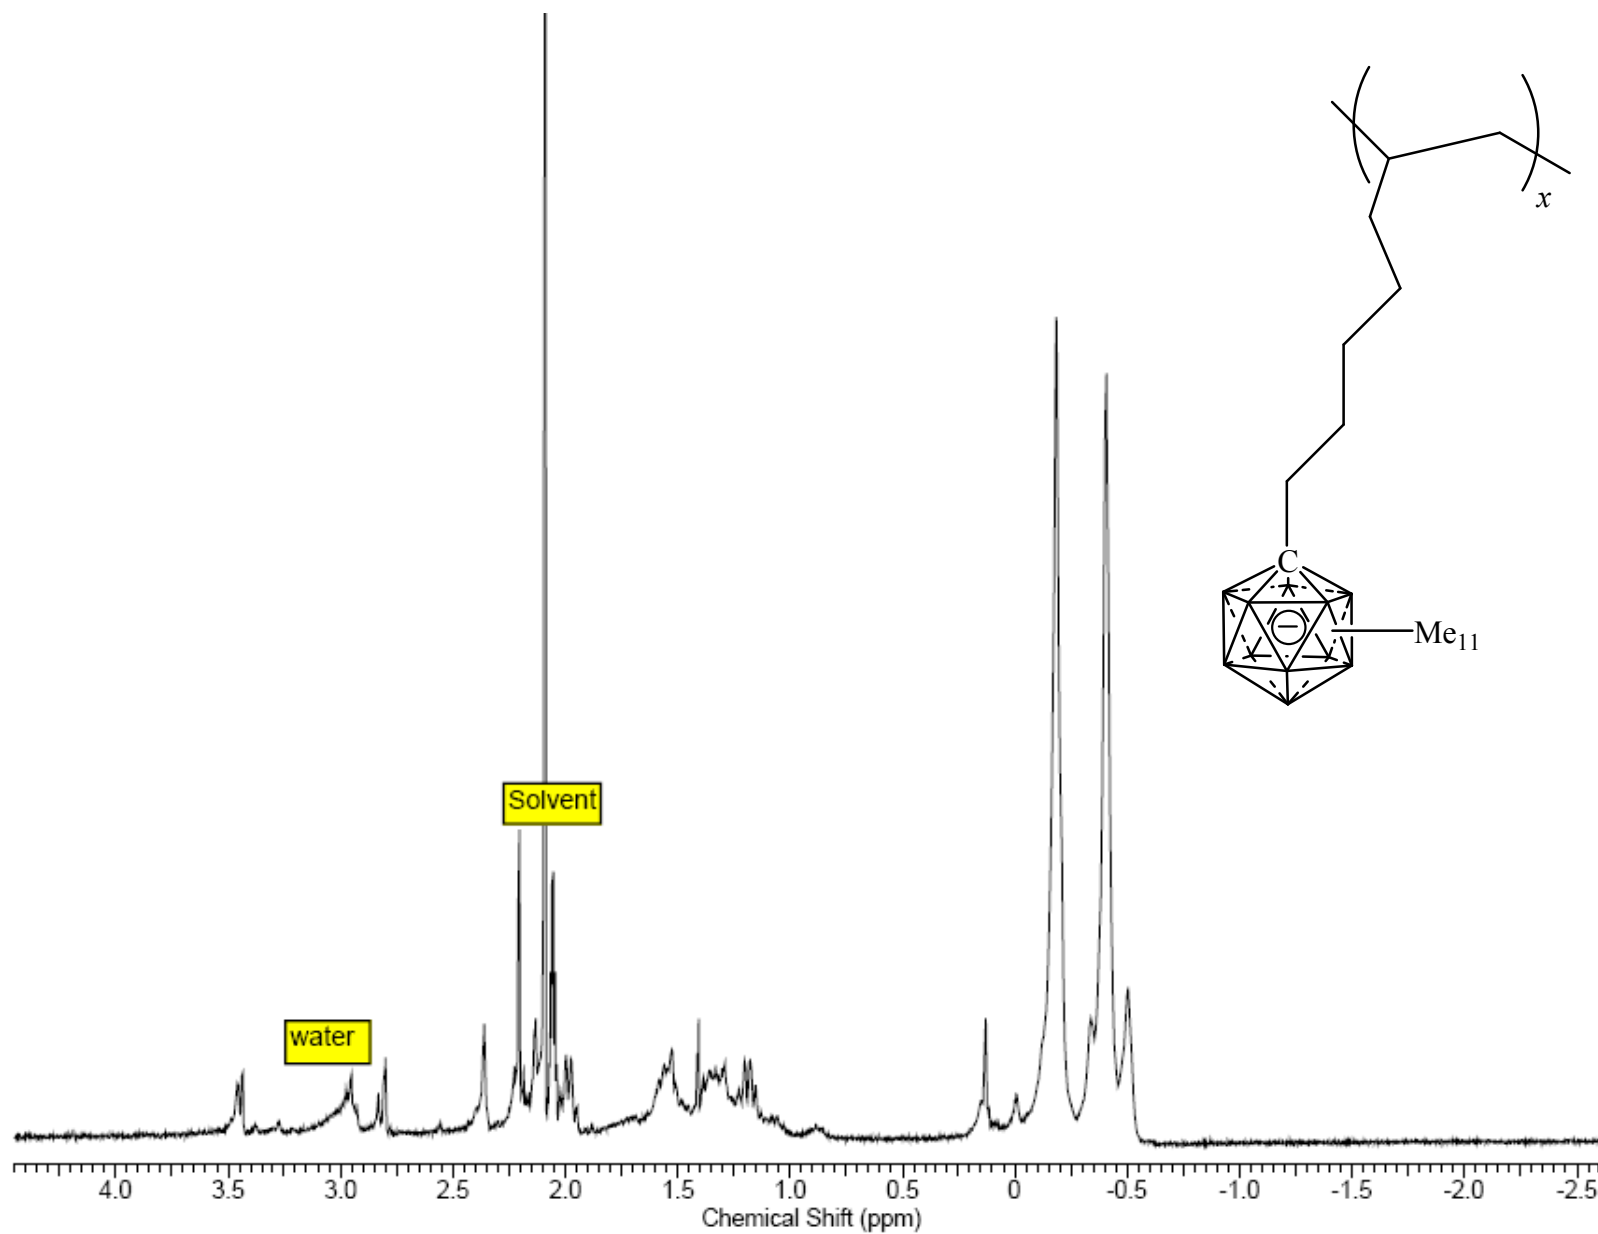

**$^1\text{H}$  NMR spectrum in acetone: poly-5[2] prepared with AIBN initiation**

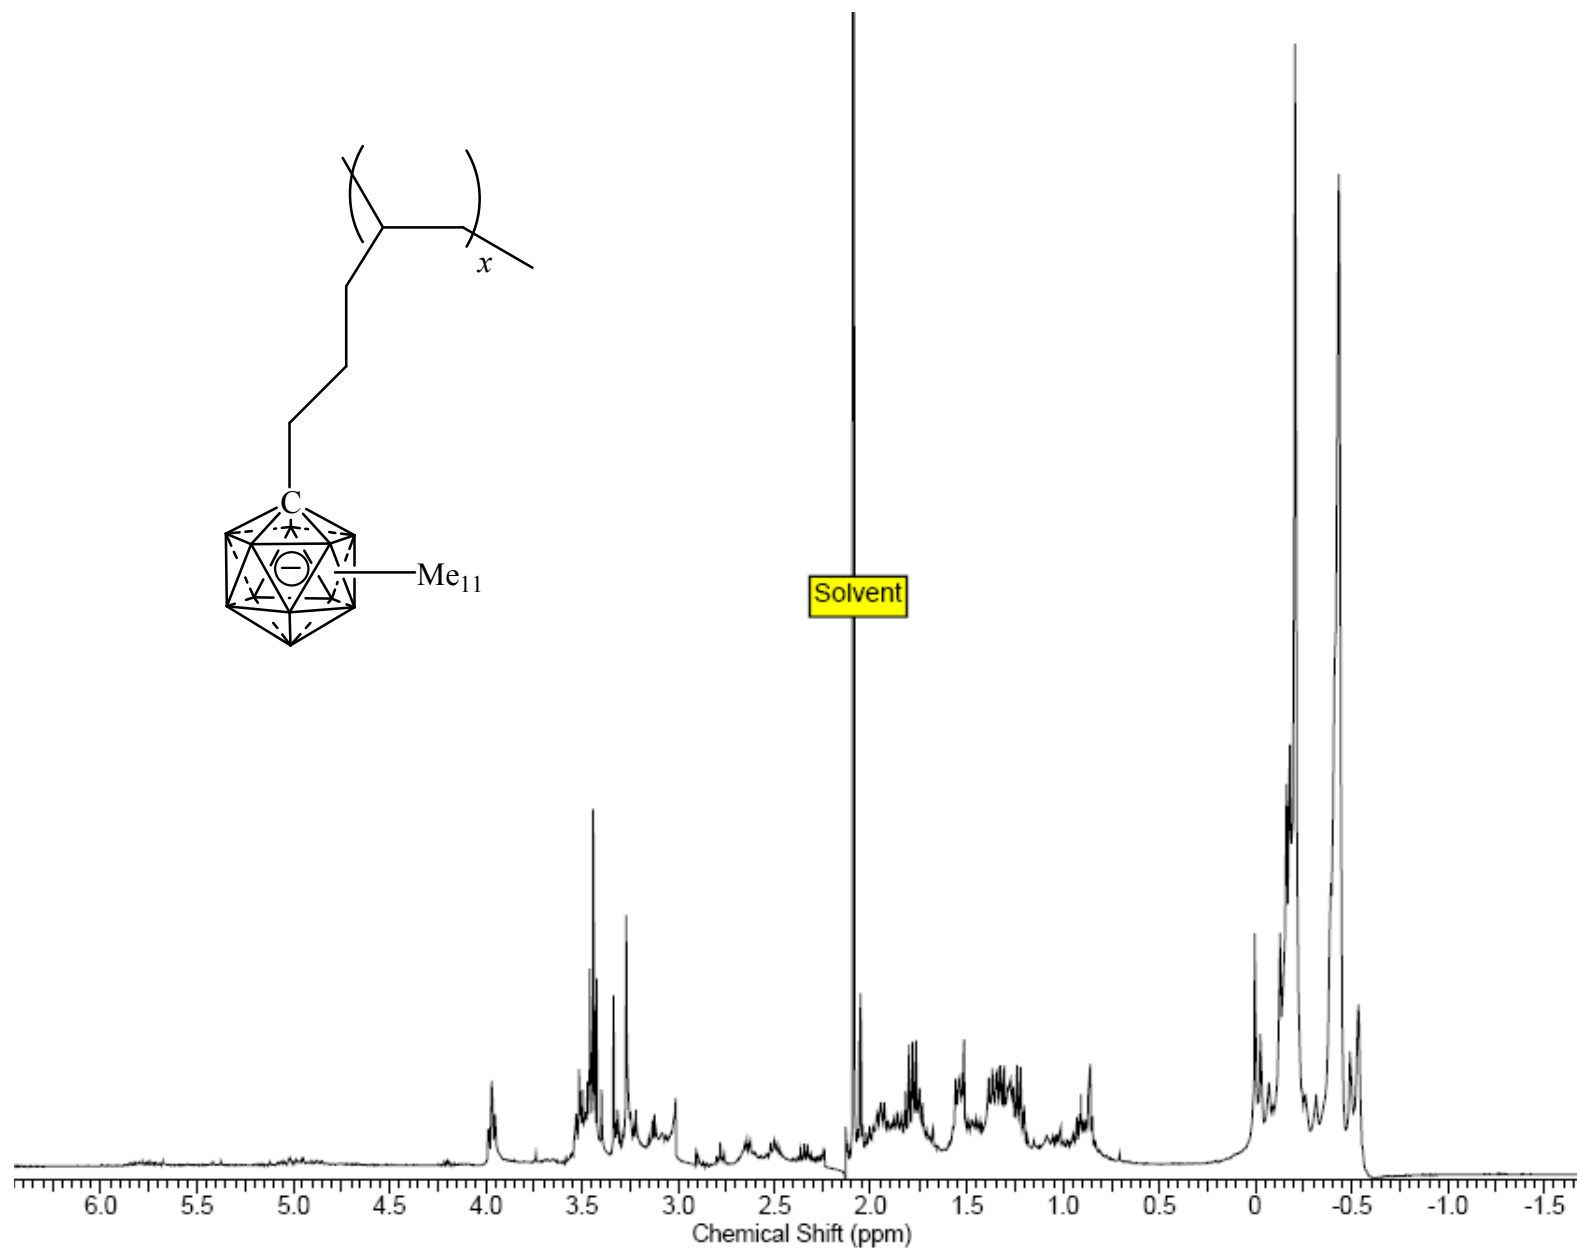

**$^1\text{H}$  NMR spectrum in acetone: poly-6[2] prepared with AIBN initiation**

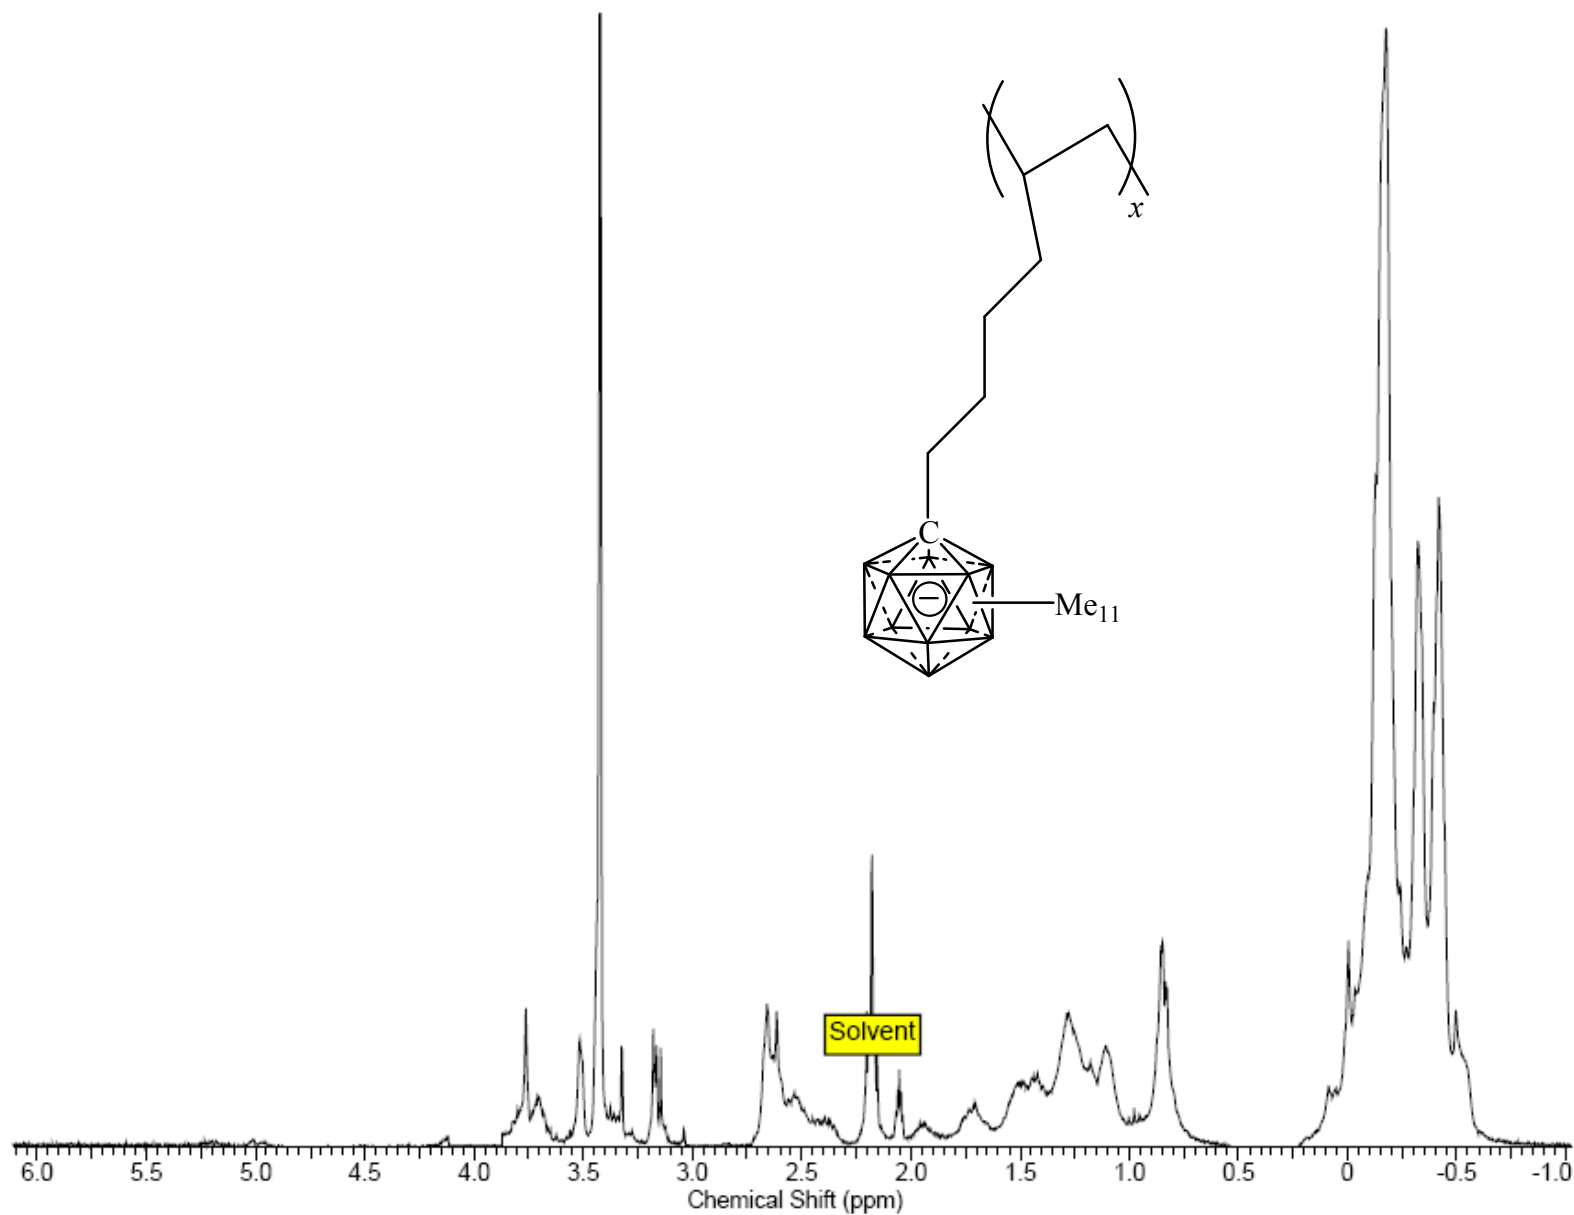

**$^1\text{H}$  NMR spectrum in acetone: poly-7[2] prepared with AIBN initiation**

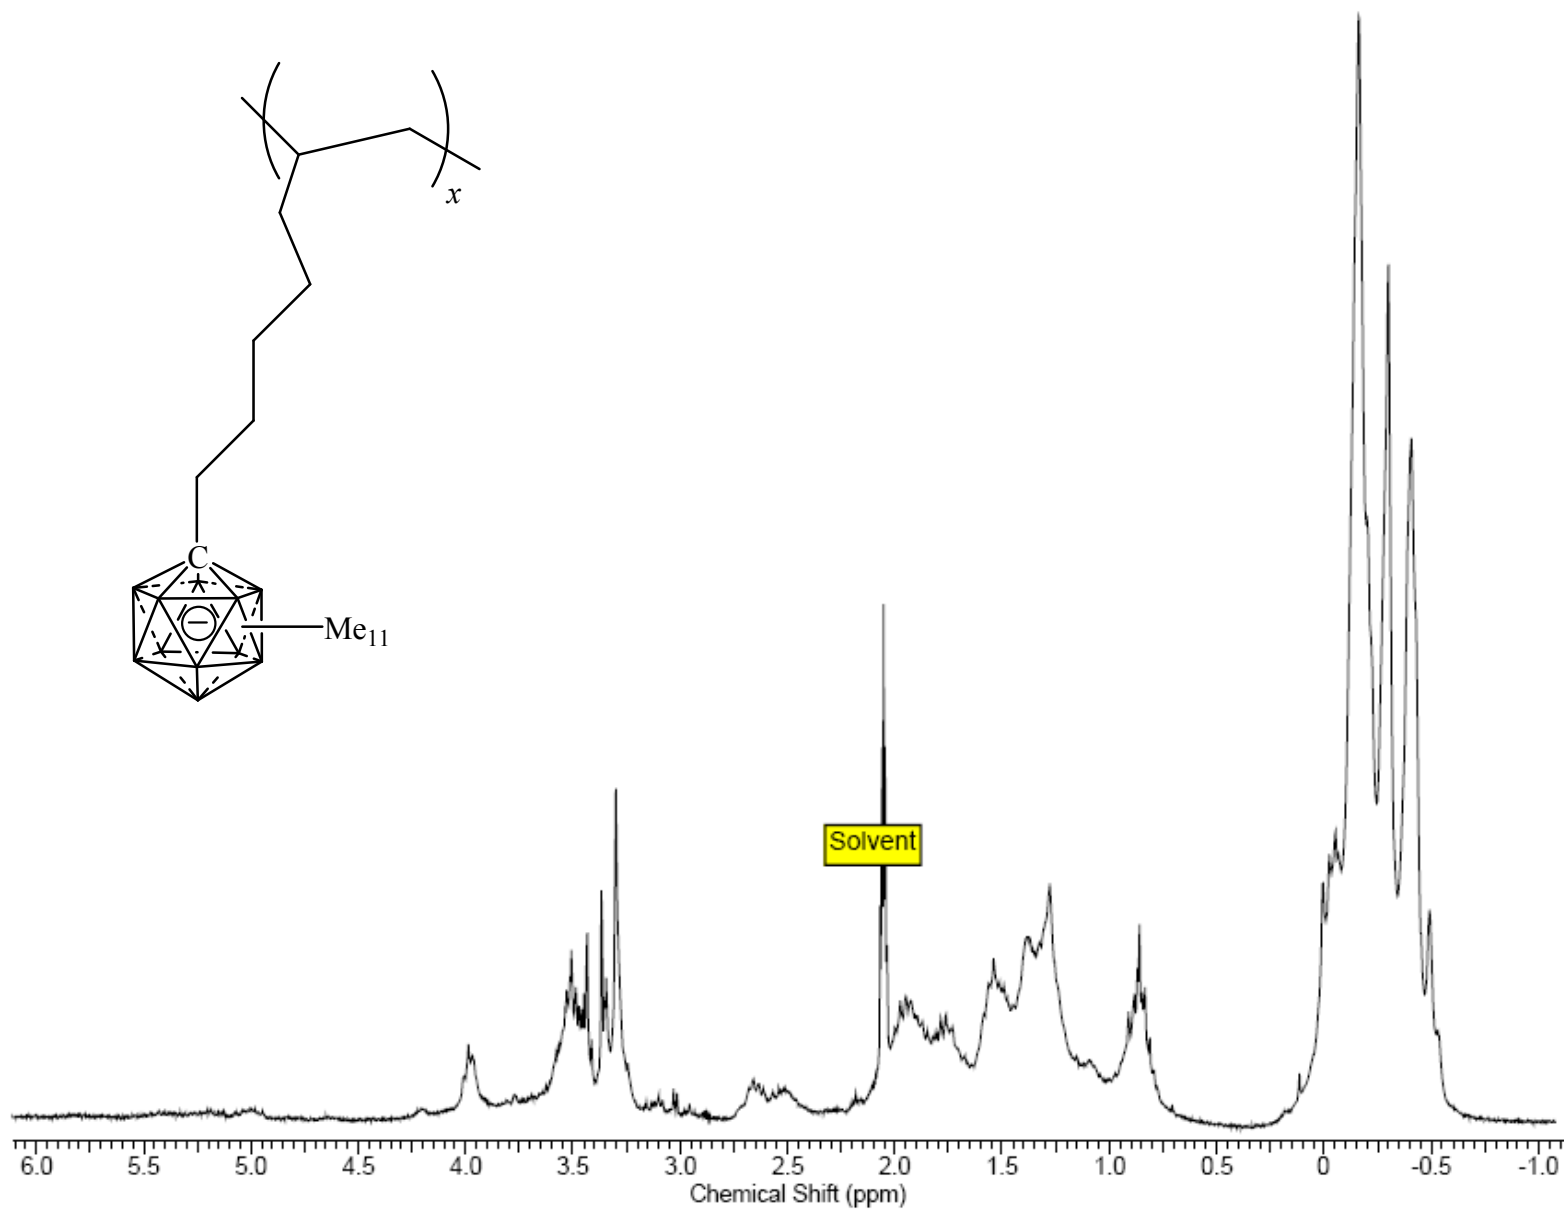



**$^1\text{H}$  NMR spectrum in acetone: poly-5[2] prepared with DTBP initiation**

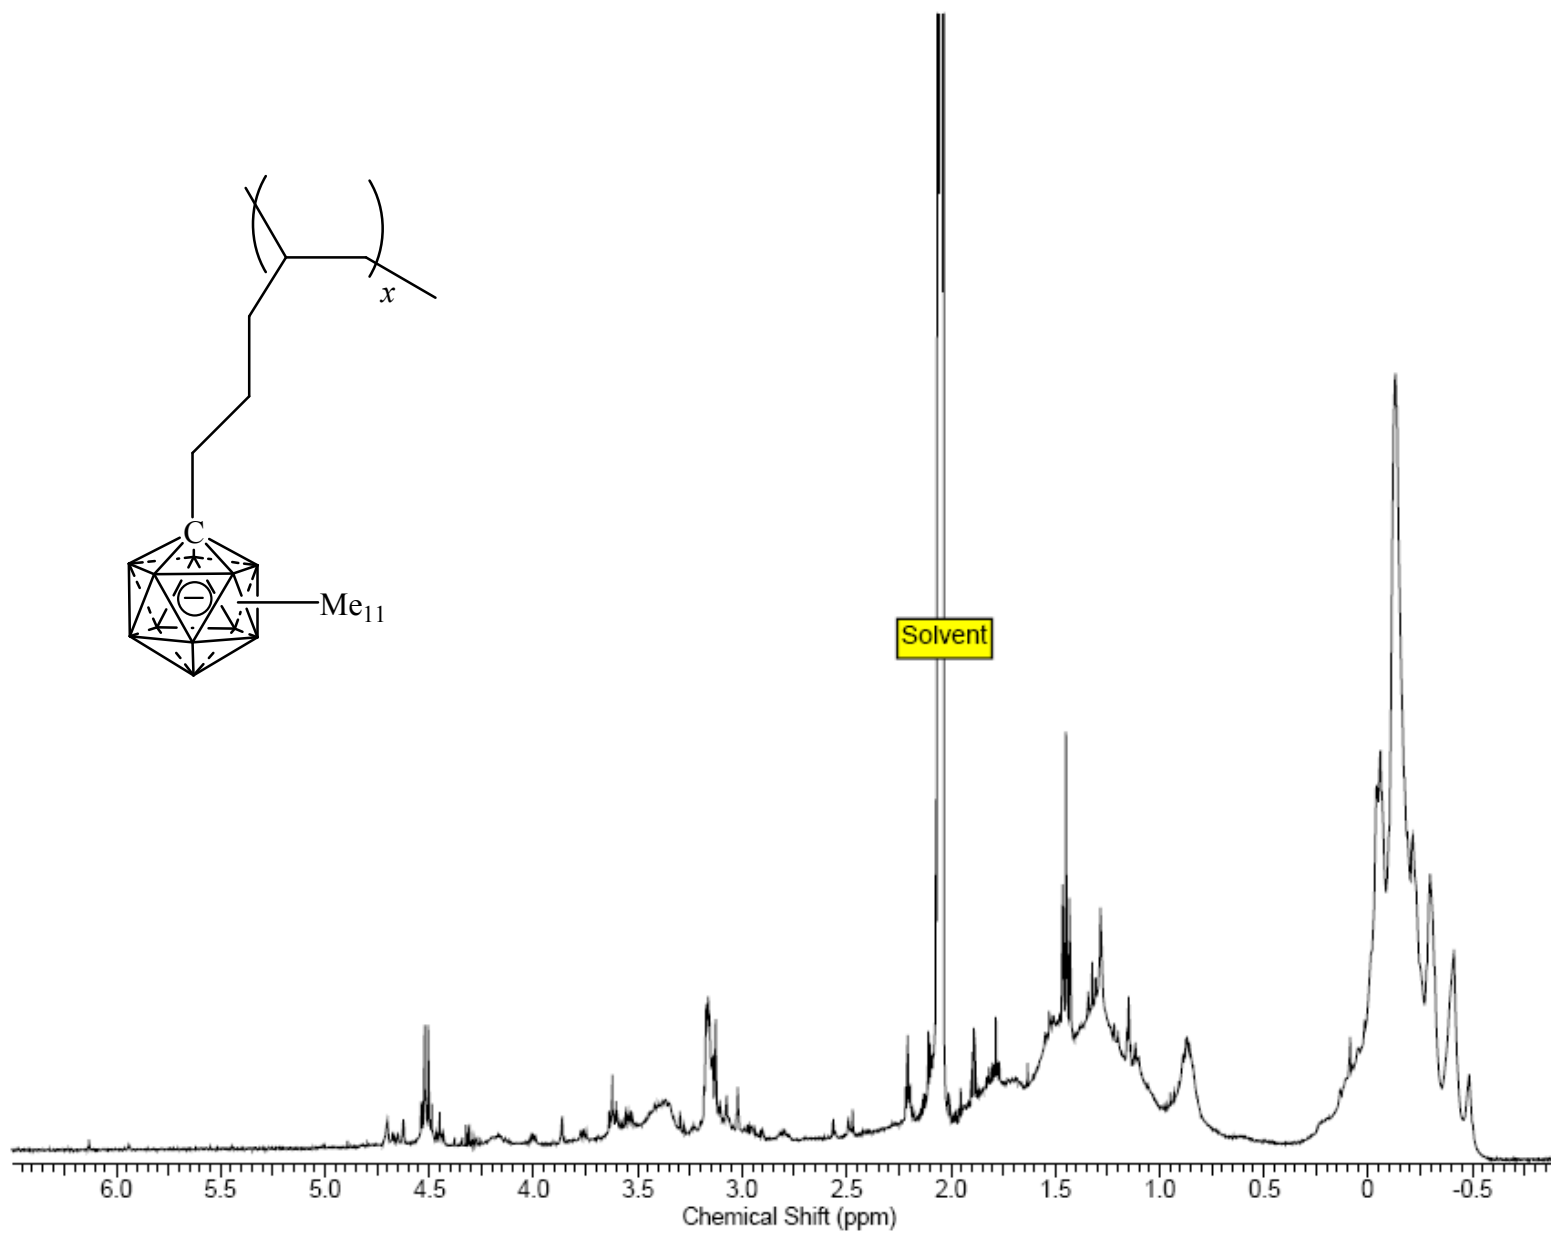

# $^1\text{H}$ NMR spectrum in acetone: poly-6[2] prepared with DTBP initiation

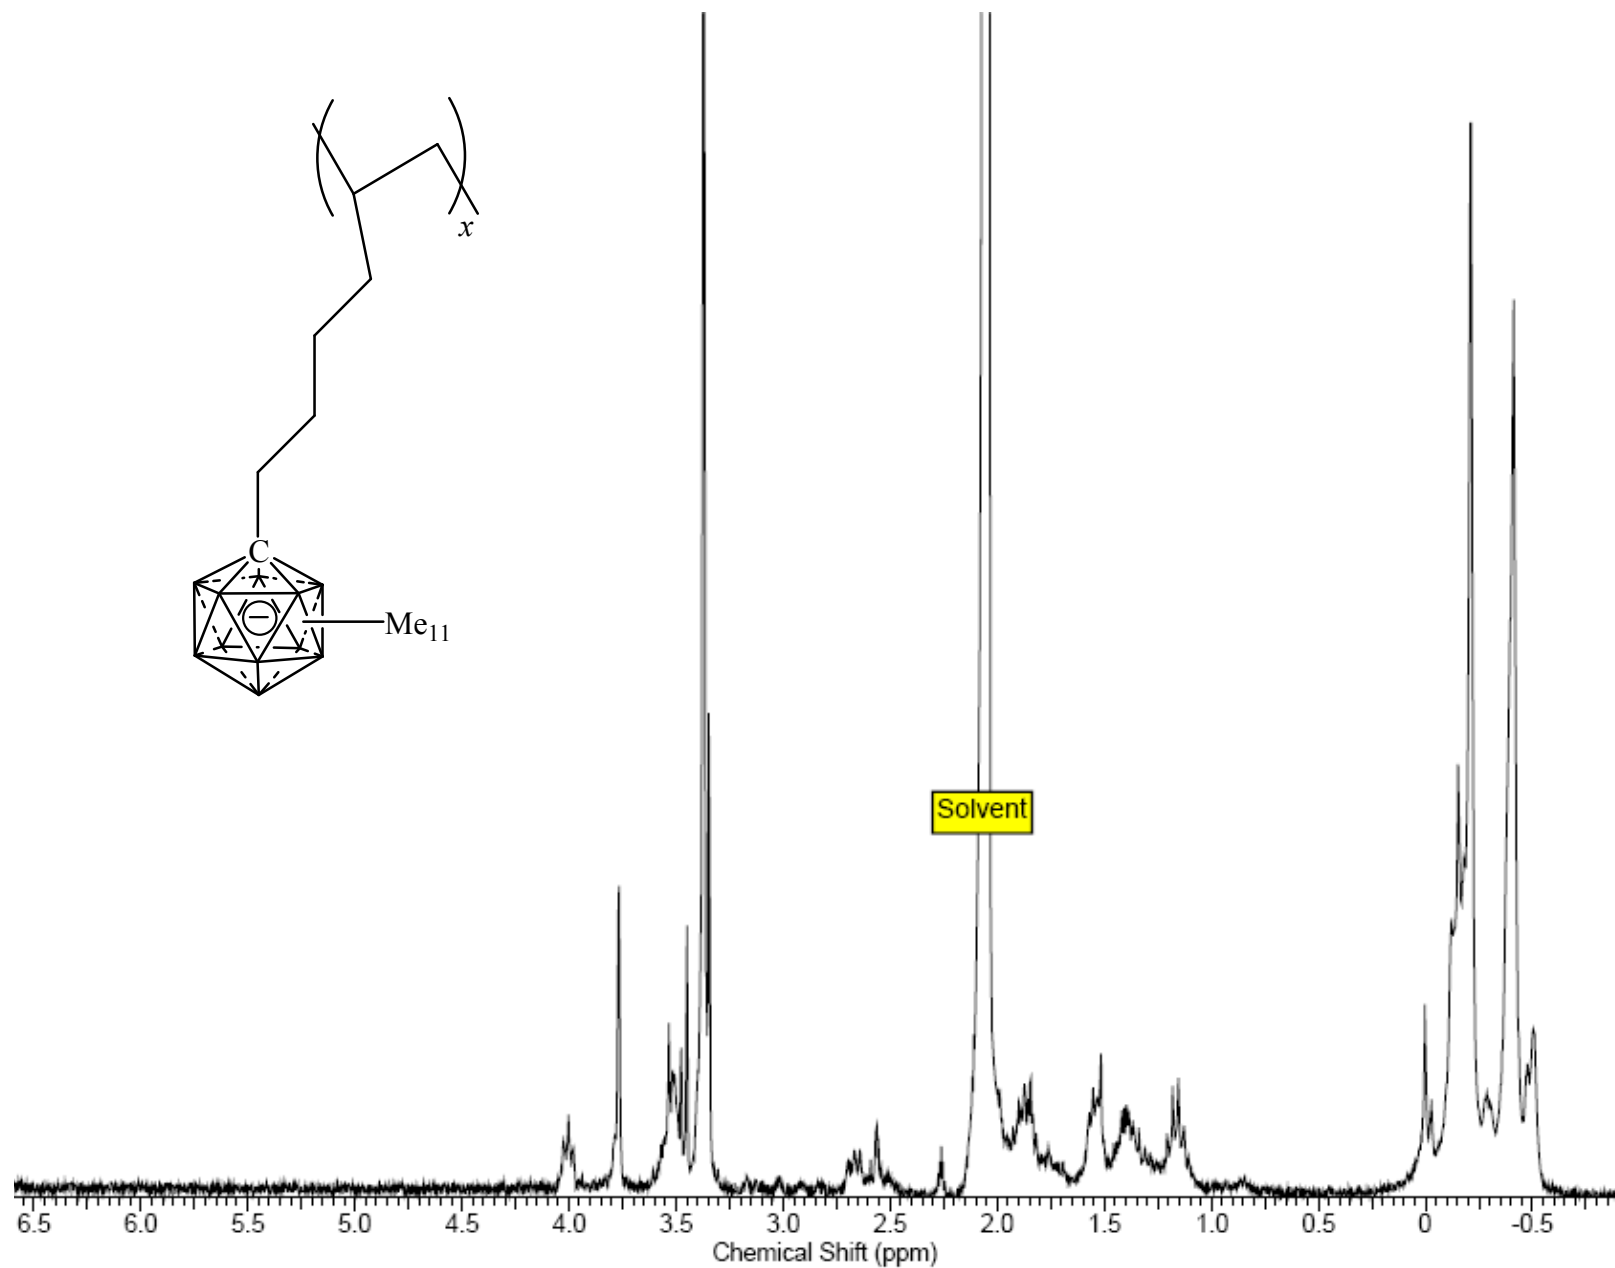

**$^1\text{H}$  NMR spectrum in acetone: poly-7[2] prepared with DTBP initiation**

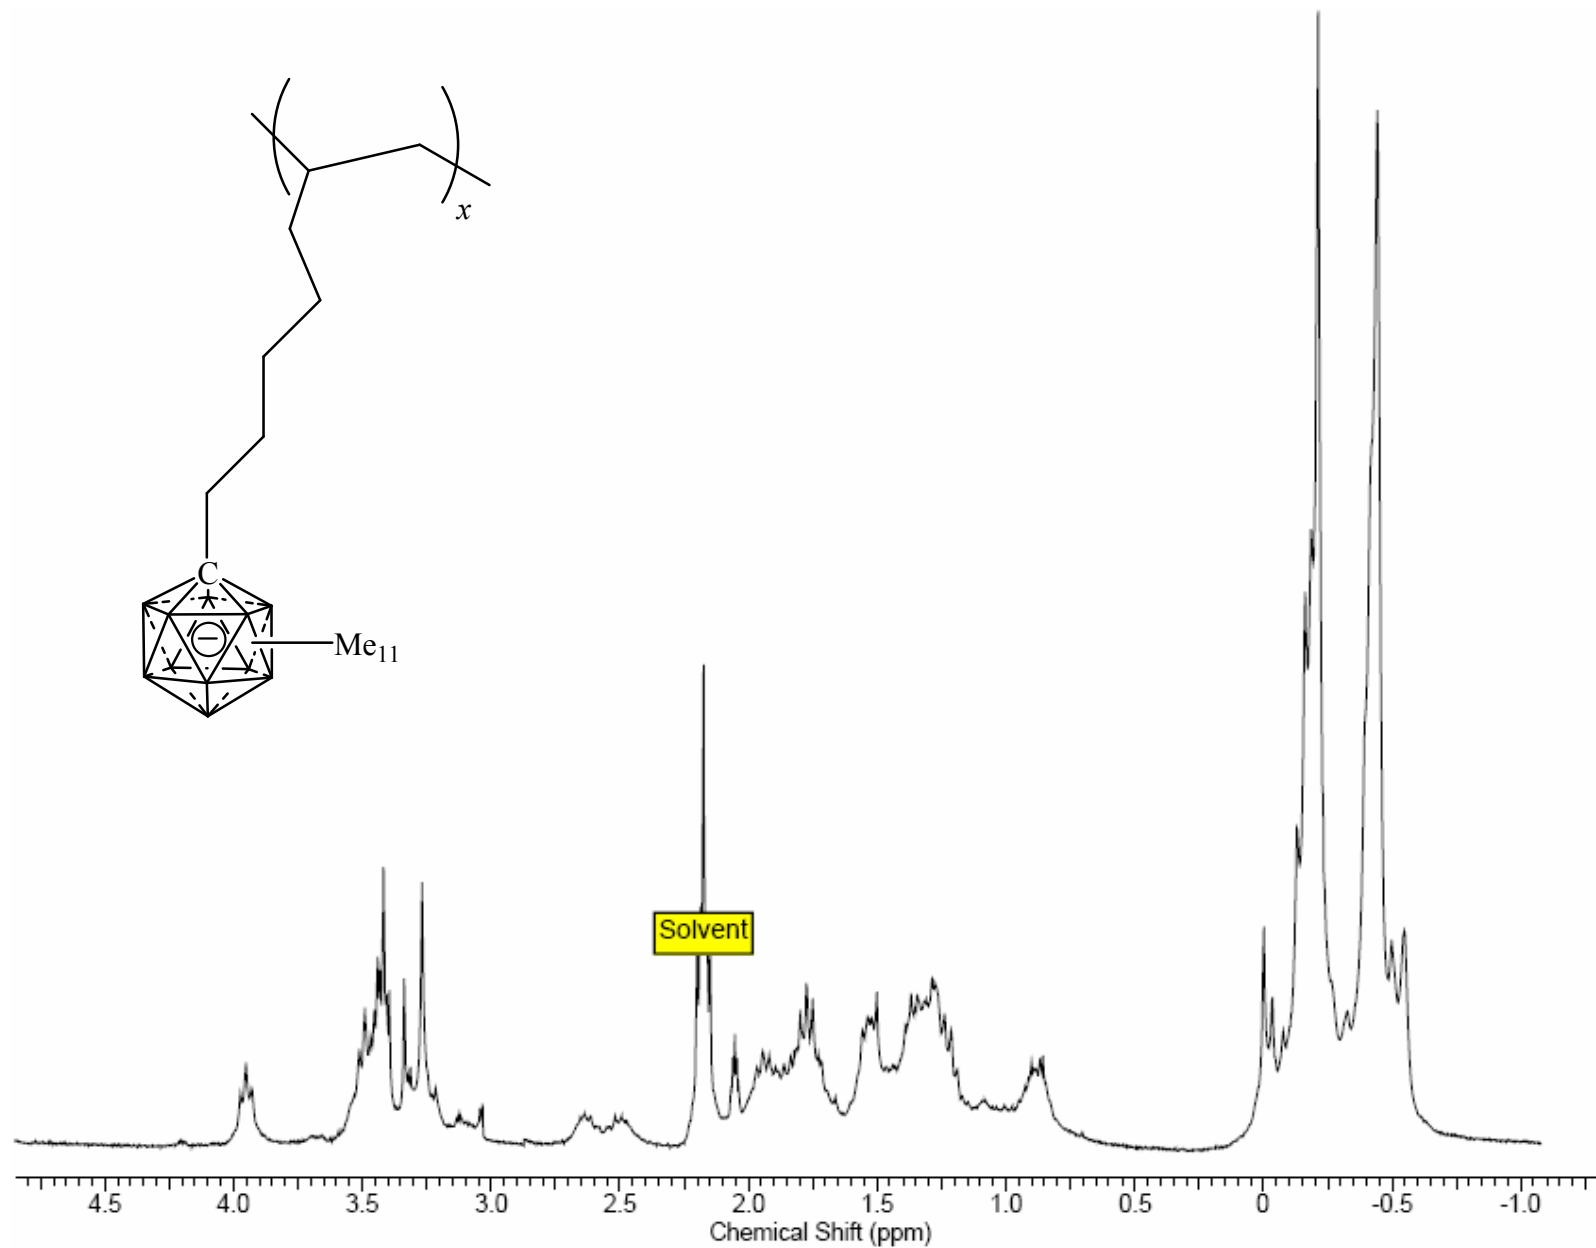

**$^{13}\text{C}$  NMR spectrum in acetone: poly-5[2] prepared with air initiation**

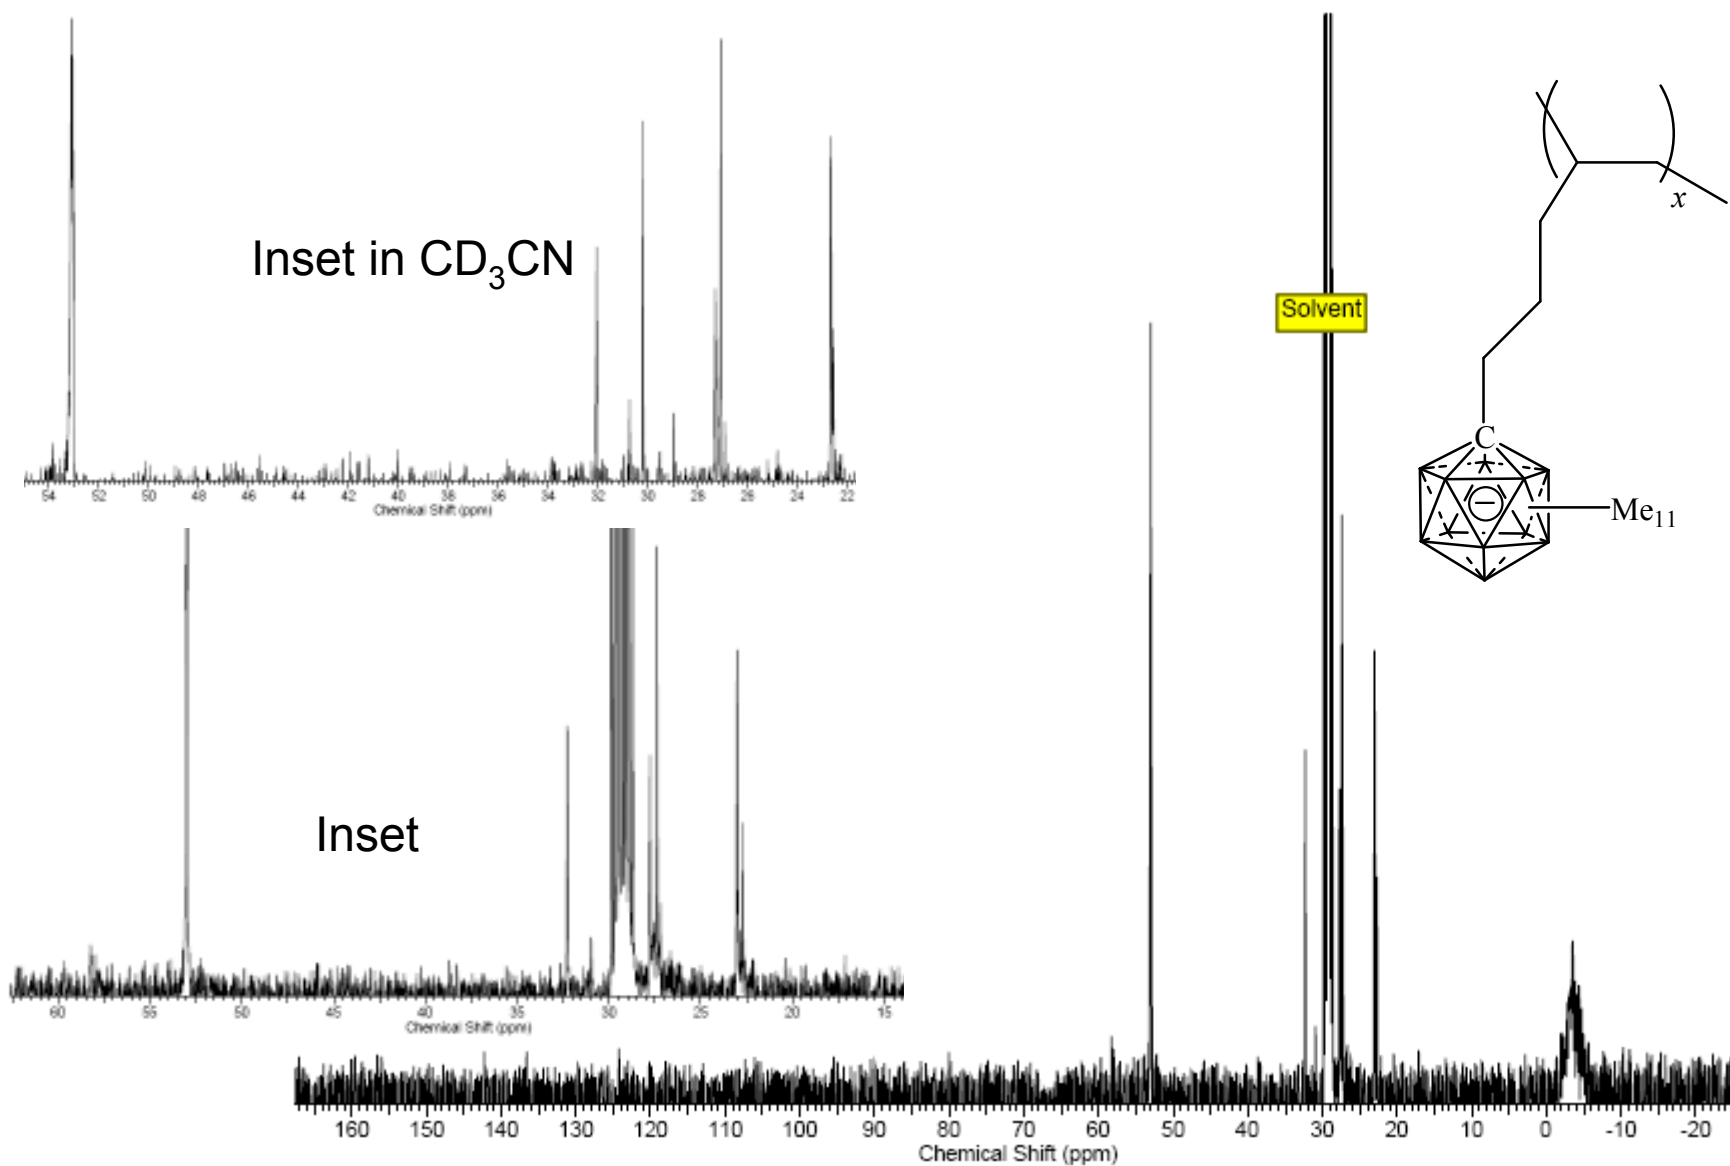

# $^{13}\text{C}$ NMR spectrum in acetone: poly-6[2] prepared with air initiation

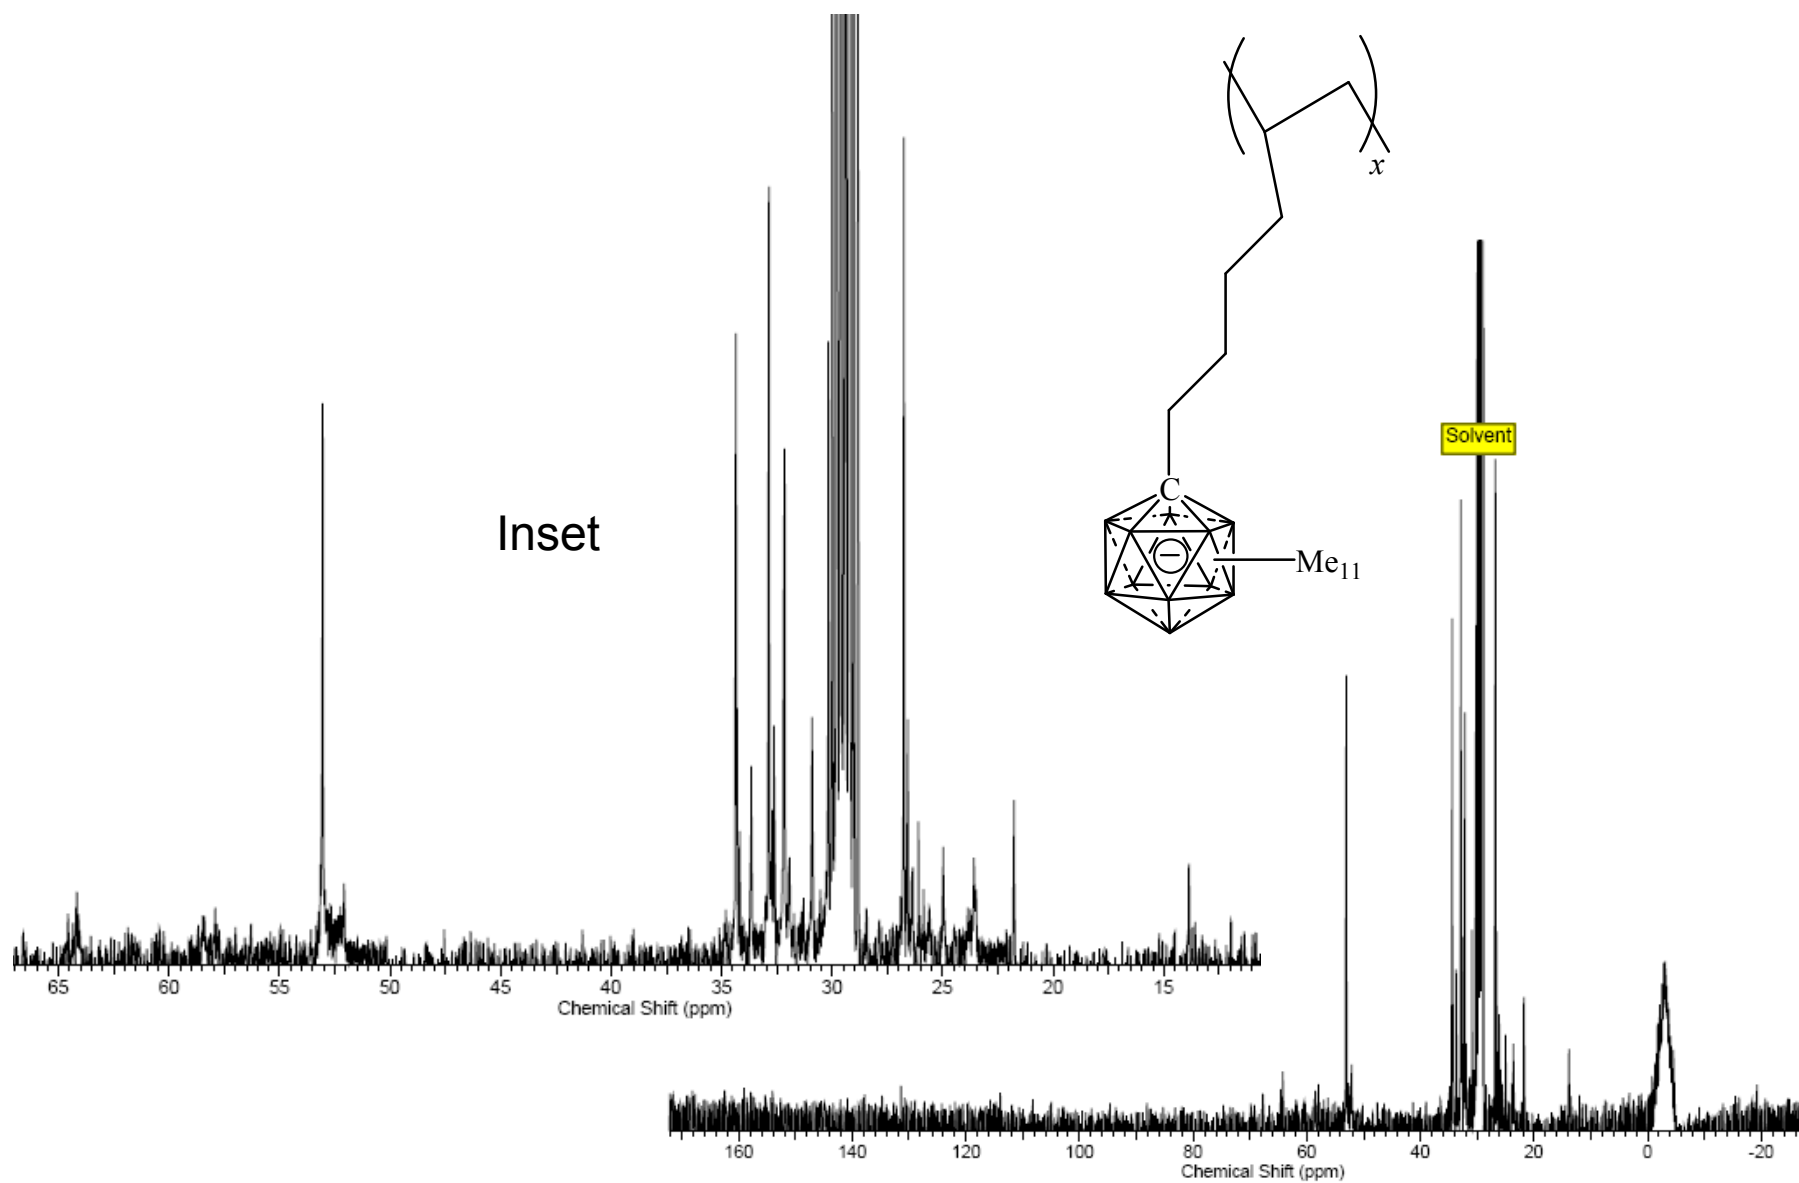

# $^{13}\text{C}$ NMR spectrum in acetone: poly-7[2] prepared with air initiation

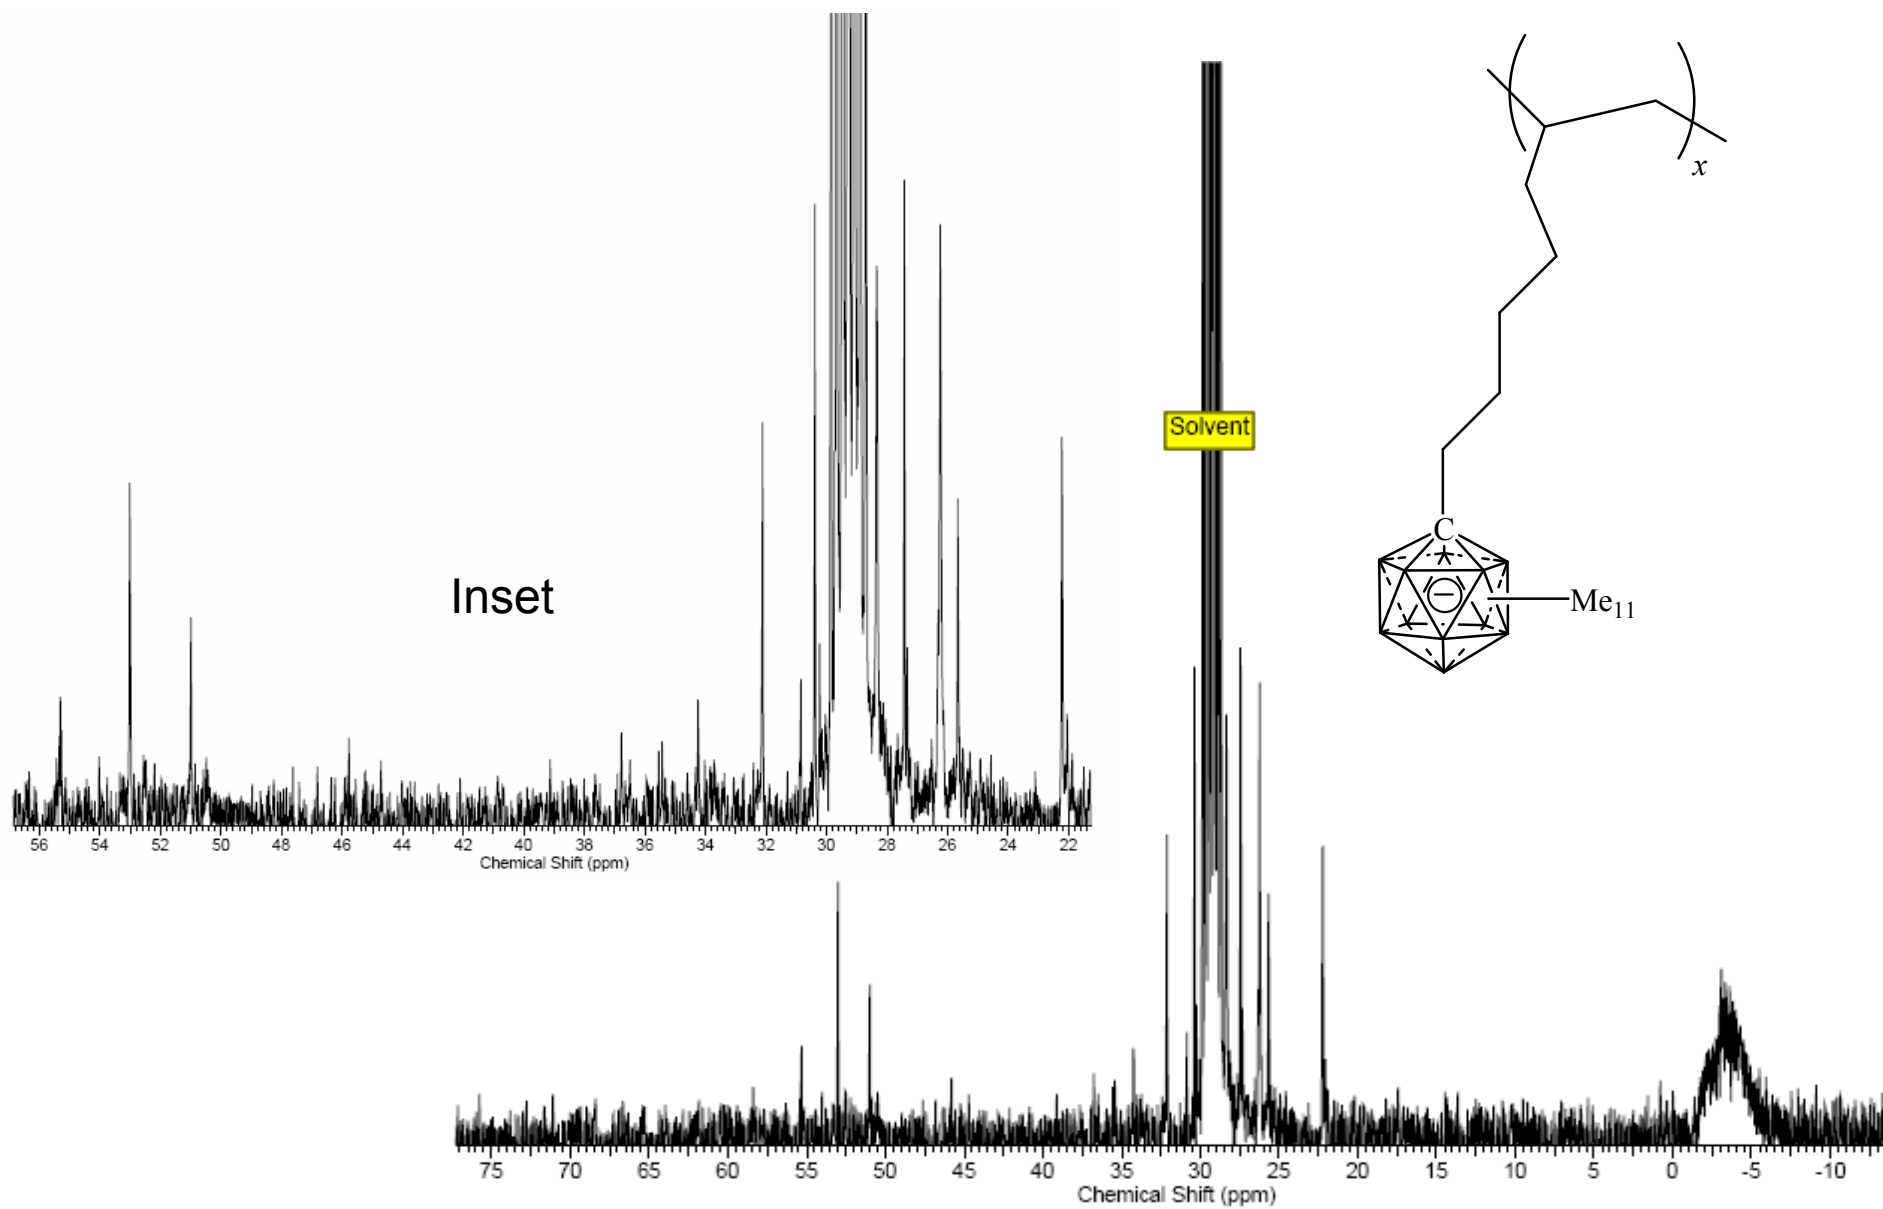

**<sup>13</sup>C NMR spectrum in acetone: poly-5[2] prepared with DTBP initiation**

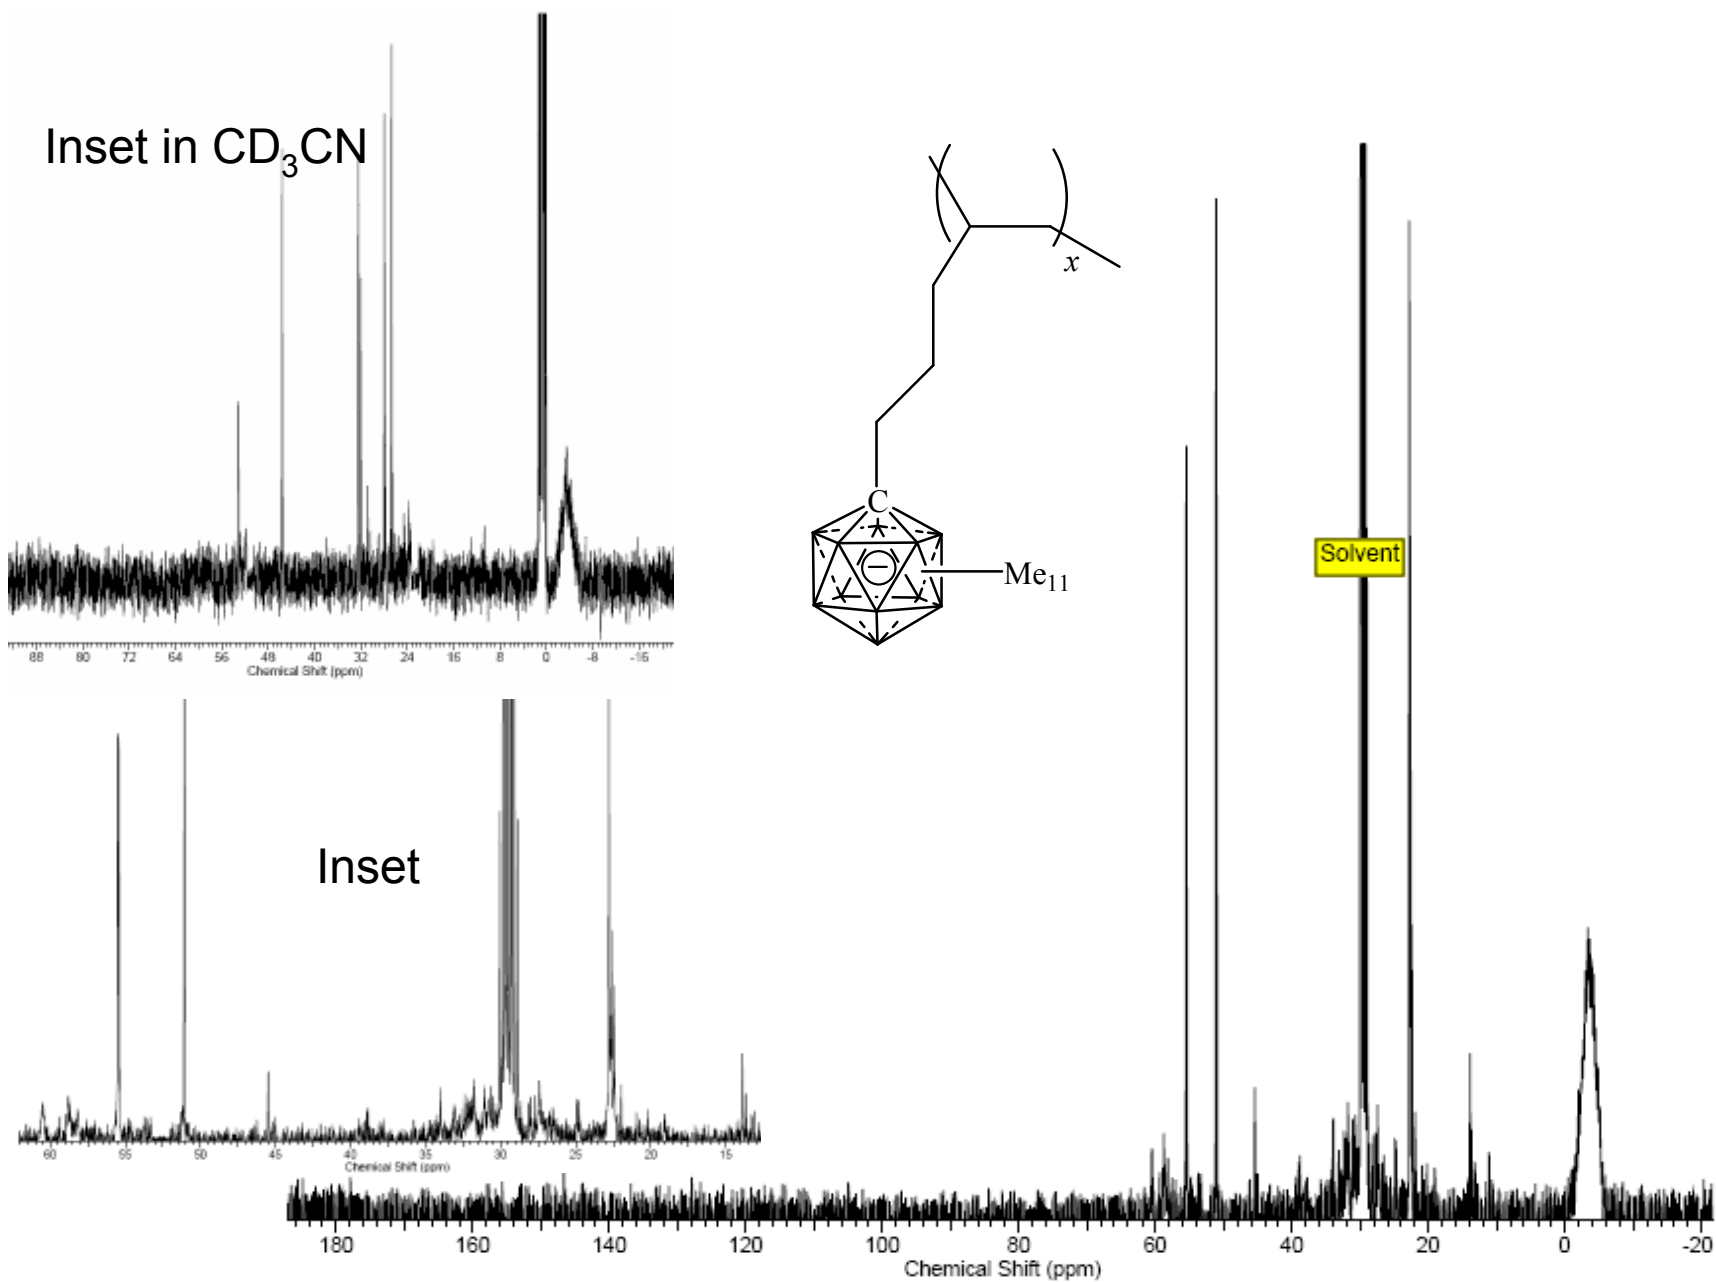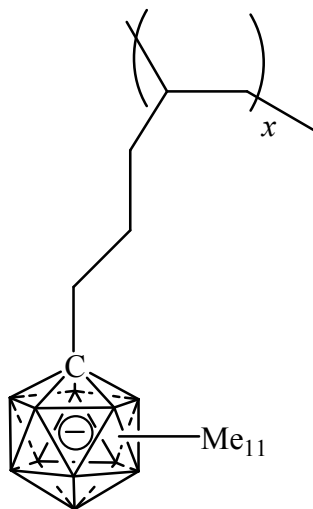

Solvent

## Inset

# $^{13}\text{C}$ NMR spectrum in acetone: poly-6[2] prepared with DTBP initiation

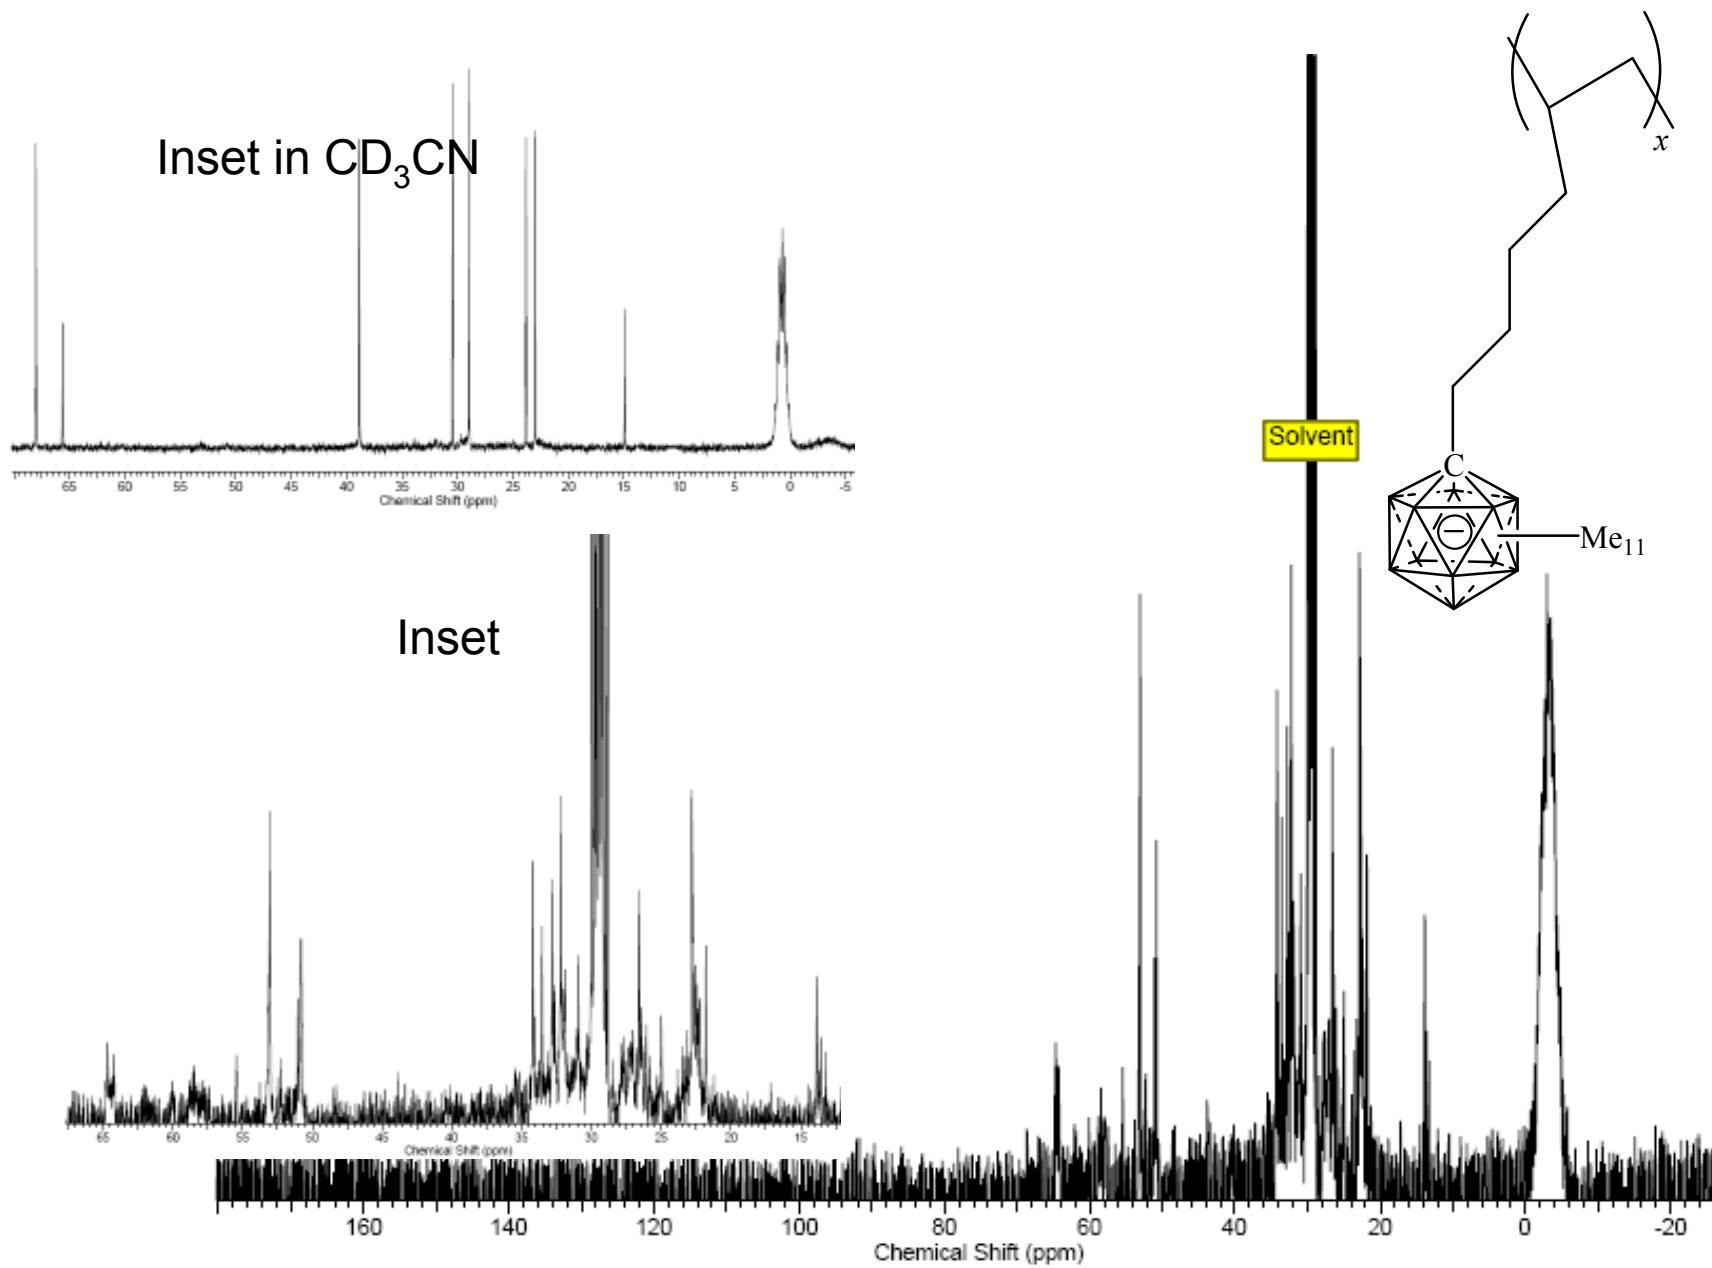



# $^{13}\text{C}$ NMR spectrum in acetone: poly-7[2] prepared with DTBP initiation

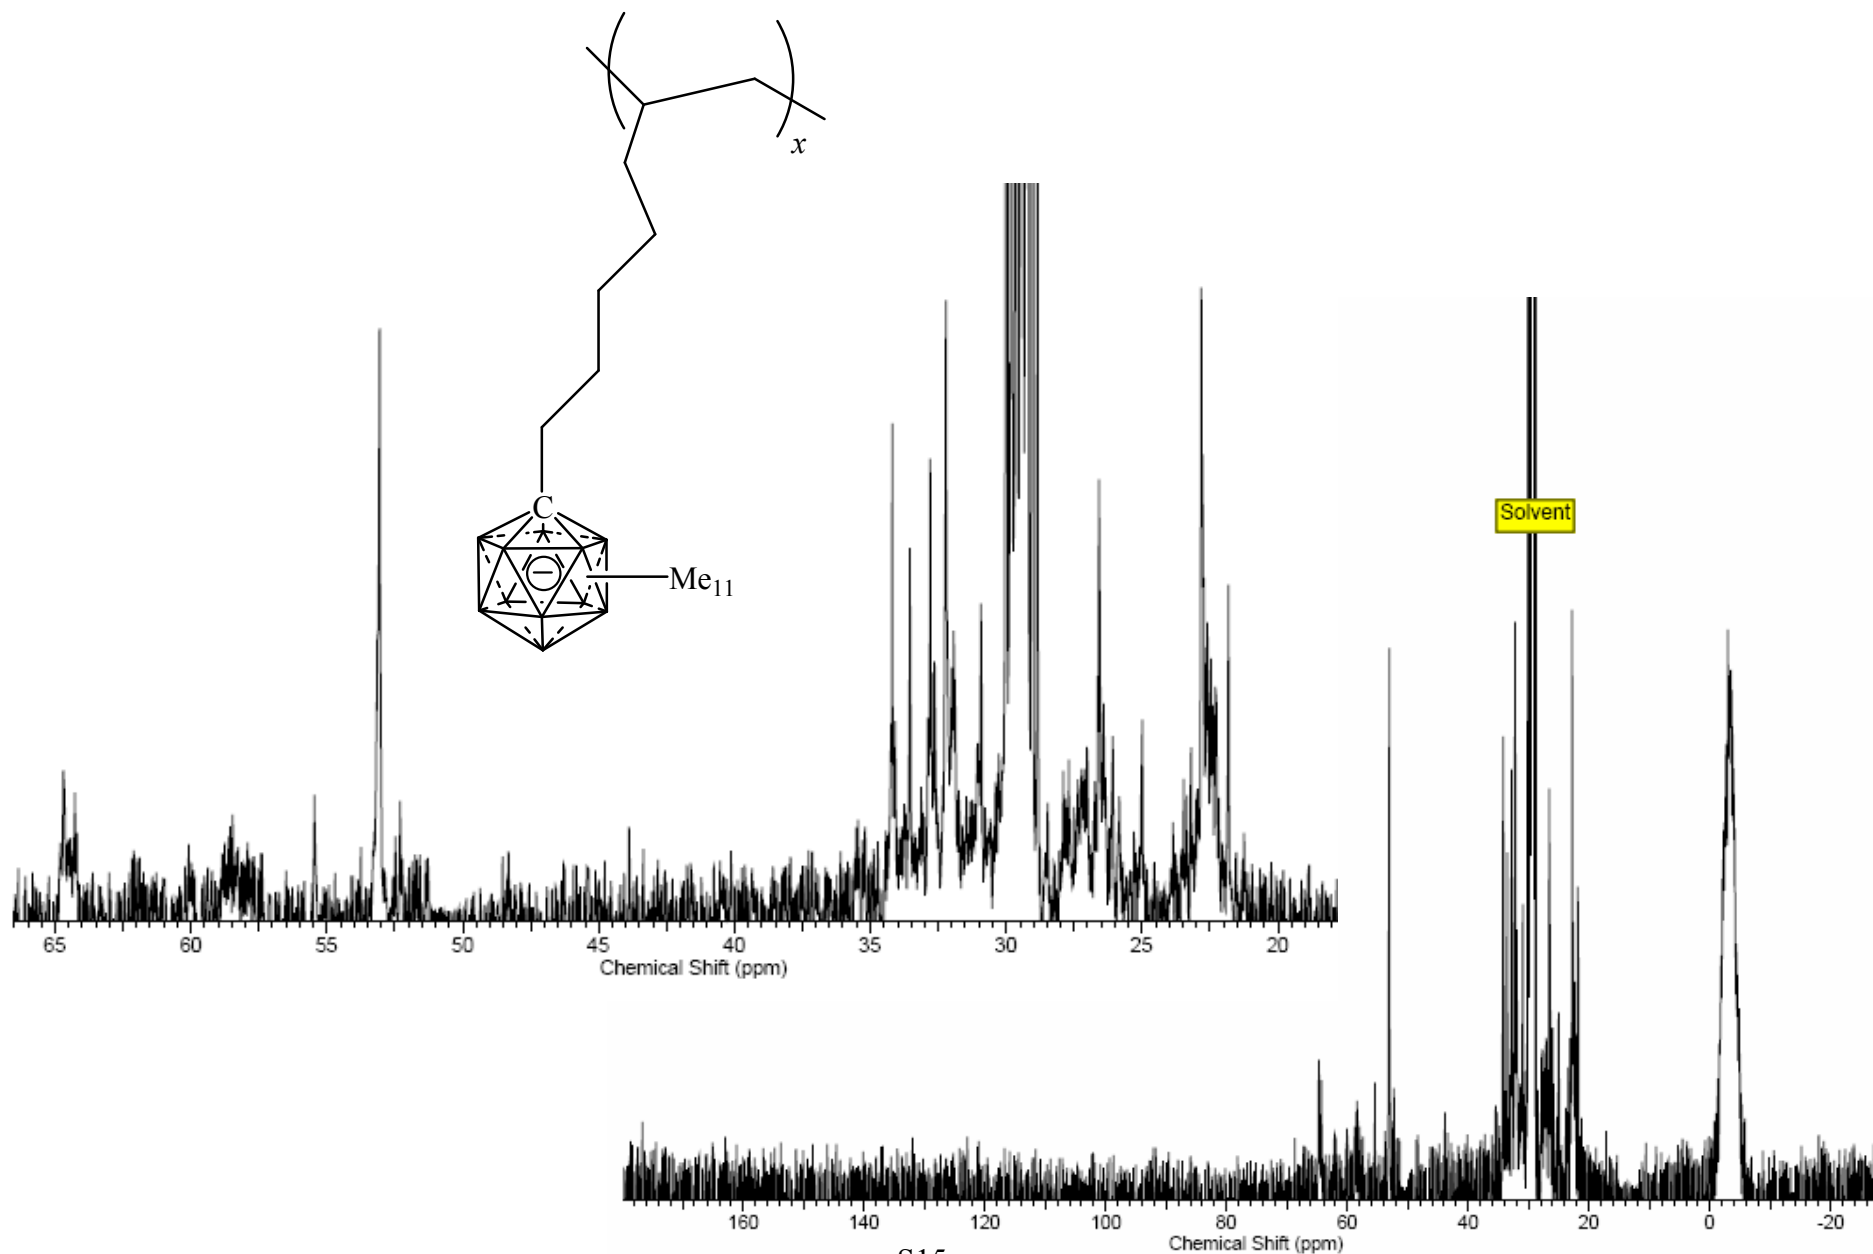

**$^{13}\text{C}$  NMR spectrum in acetone: poly-5[2] prepared with AIBN initiation**

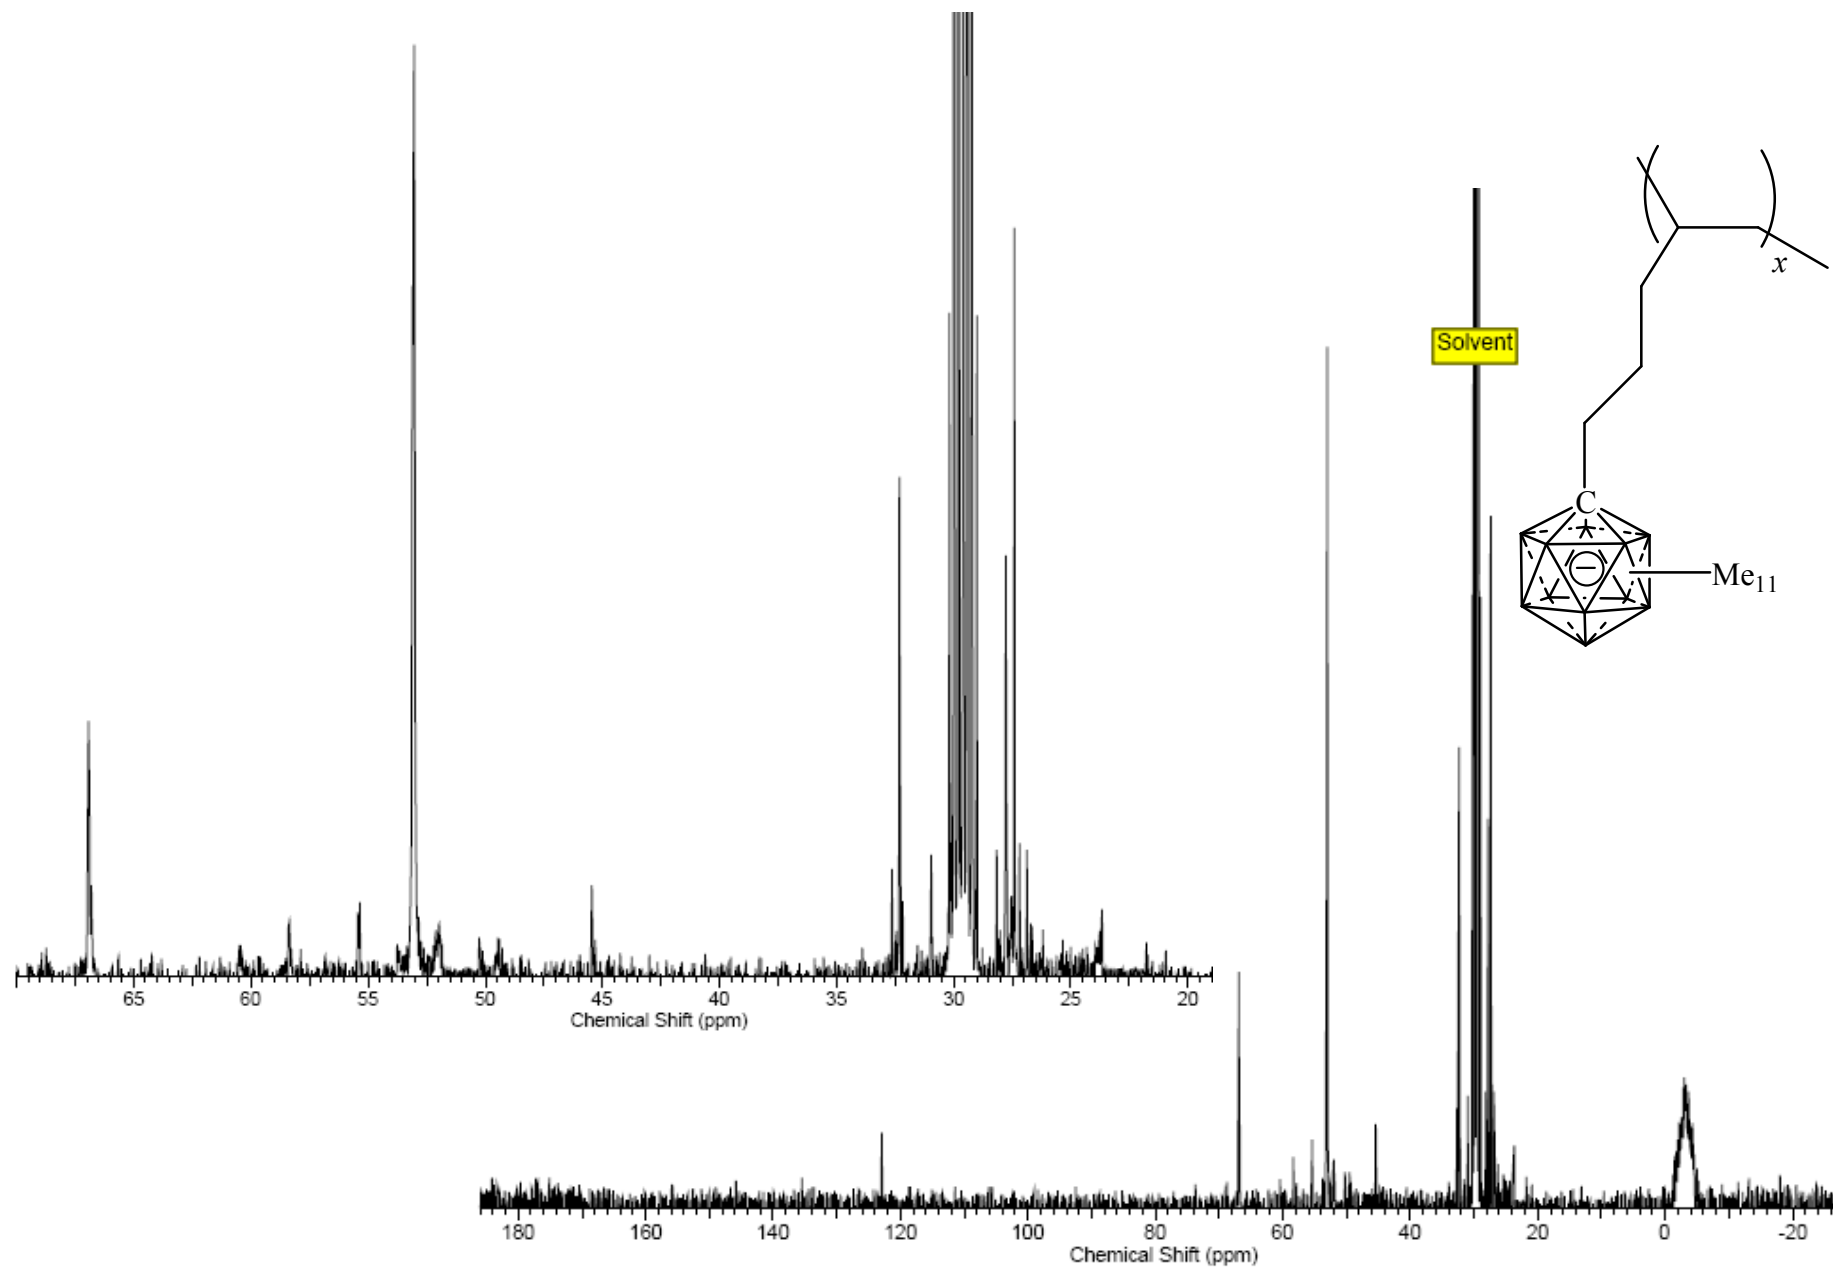

# $^{13}\text{C}$ NMR spectrum in acetone: poly-6[2] prepared with AIBN initiation

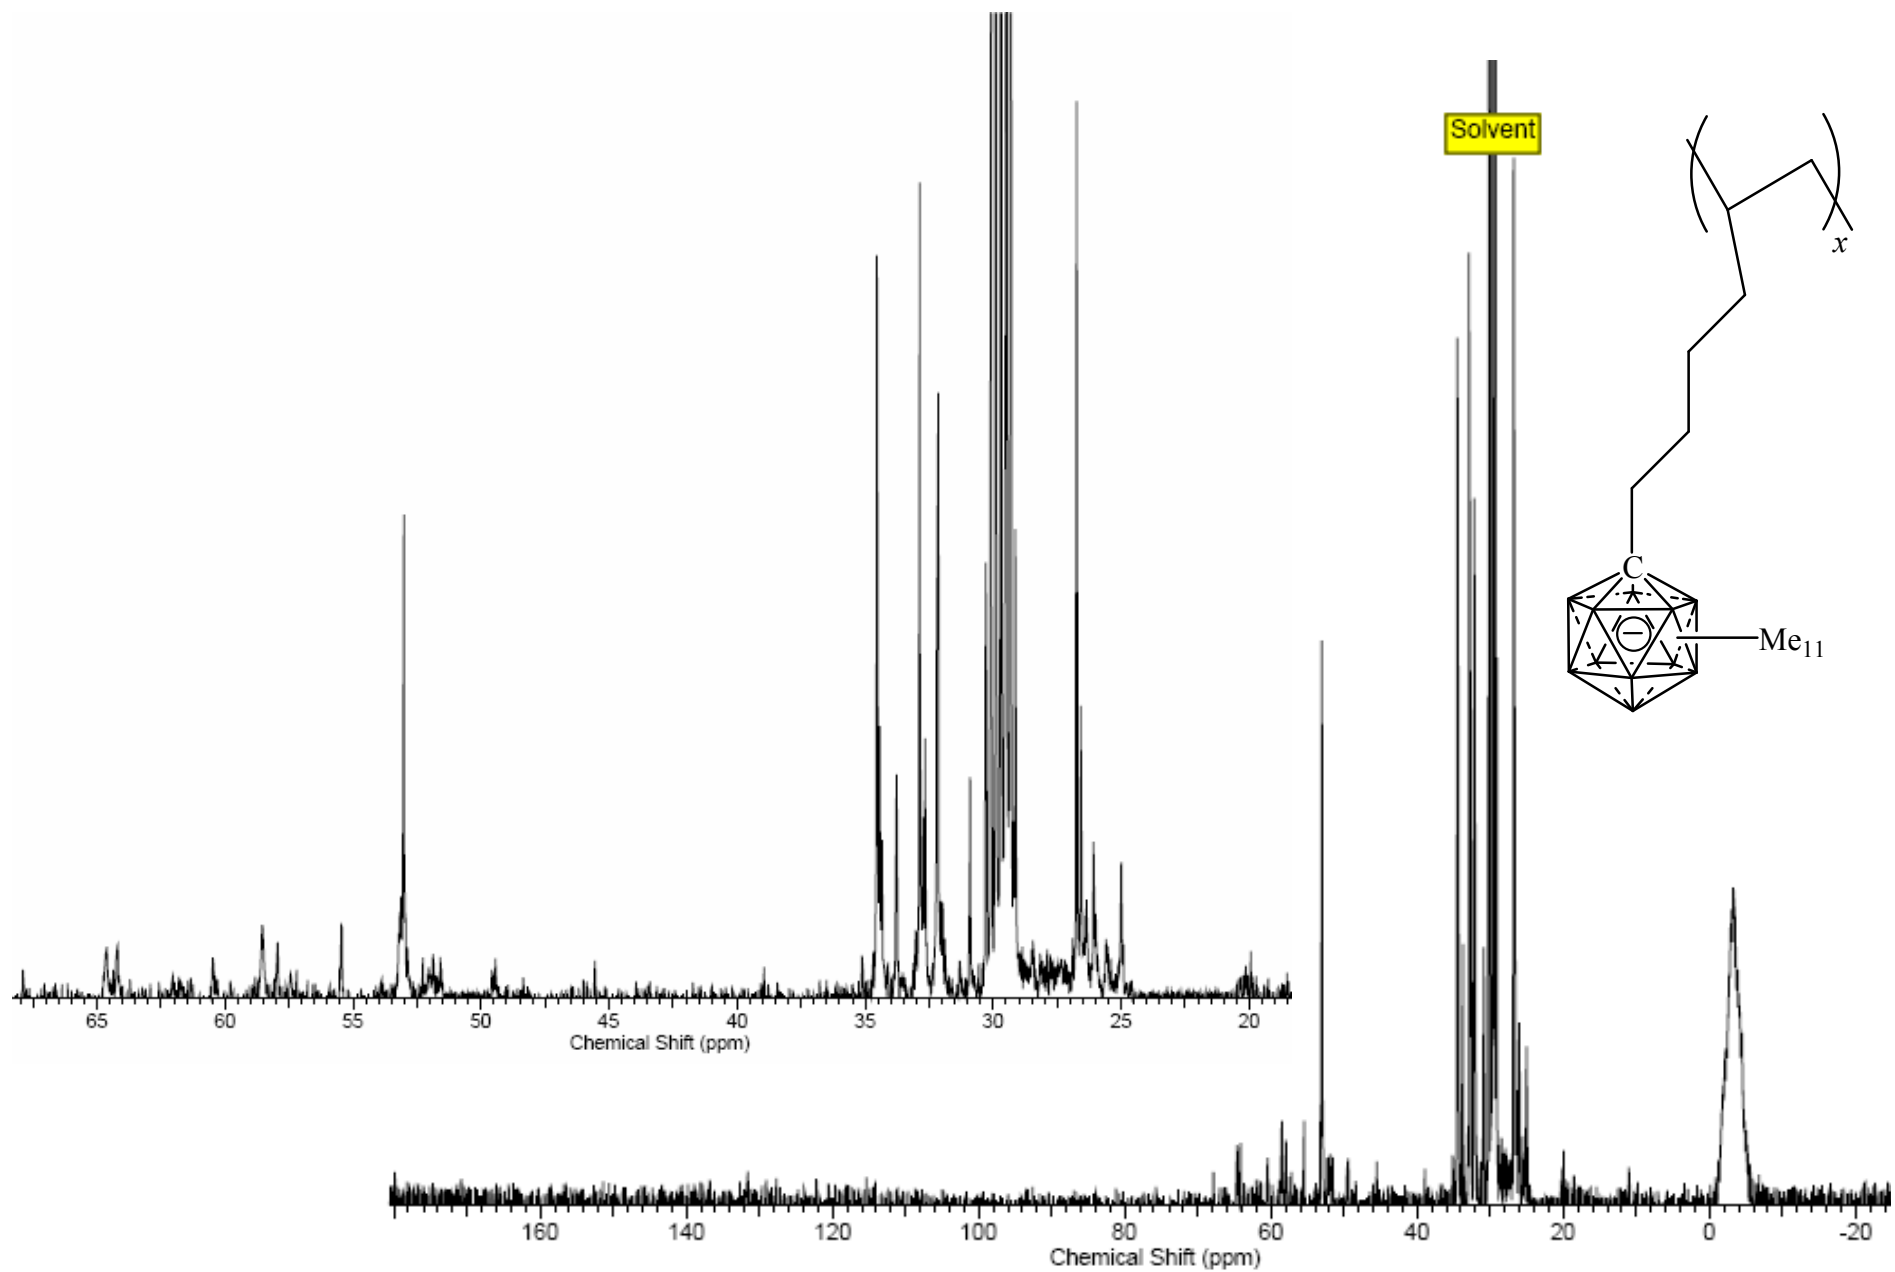

**$^{13}\text{C}$  NMR spectrum in acetone: poly-7[2] prepared with AIBN initiation**

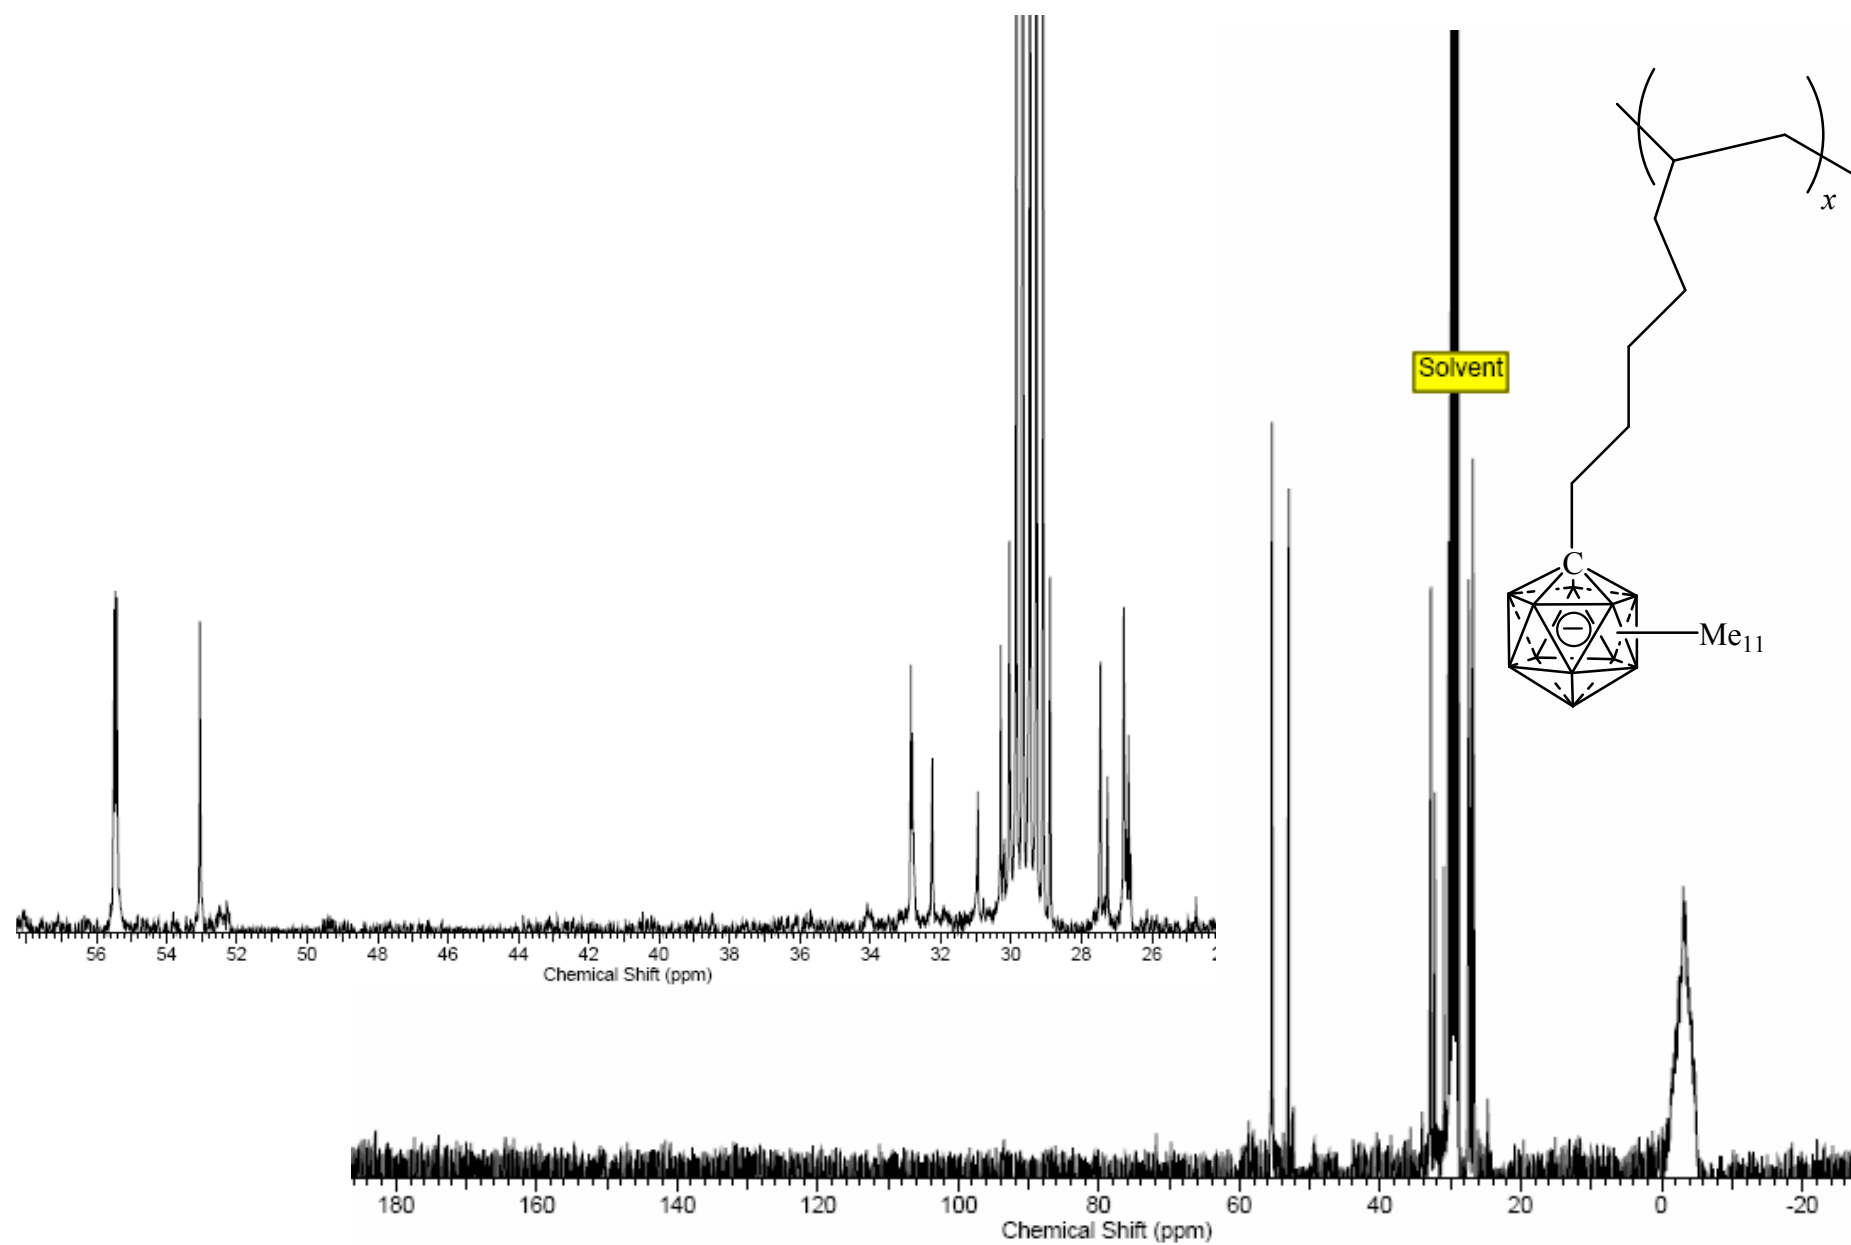

Supplement: Supplementary file 1 [file 5058316]
